# Supplementary material for: The assumption of safety is being used to justify the rollout of 5G technologies
Source: Front Public Health. 2023 Jan 26;11:1058454. doi: 10.3389/fpubh.2023.1058454 (PMC9940636; doi:10.3389/fpubh.2023.1058454)
Supplement: Supplementary file 1 [file Table_1.xlsx]

## Sheet: All >6GHz experimental papers
PaperID	Title	Main Author	Date_Pub	C_Code	Journal	Language	RF Freq	RFLow	RFHigh	Sar_val	PowerDensity	Cumulative Hrs	SignalGen	WaveType	Animal	Specific Exposure	Effect	In Vitro	In Vivo	Epidemiology	Human_Pro	Gov Radiation	Industry/Telecoms Inst	Gov Comms	Military	GFund	PFund	PubFund	IndFund	InstFund	UNFund	UnkFund	NonThermal	Genotoxic	Morph/Histo	Gene Exp	Prolif	Viability	Enzyme Act	Biochemical	Membrane	Fertility	Endocrine	Develomenta	Synergistic	Immune system	Haemotological	Tumour Growth	Cell Signalling
1464	Cardiovascular and thermal effects of microwave irradiation at 1 and/or 10 GHz in anesthetized rats	Jauchem	2000-04-01	USA	Bioelectromagnetics	English	10000			12	380000	0.433333	RF Signal Generator	Continuous	Rats	Left Lateral Exposure	Effect	0	1	0	0	0	0	0	1	1	0	0	0	0	0	0	0	0	0	0	0	0	0	0	0	0	0	0	0	0	0	0	0
2838	The in vivo effects of low-intensity radiofrequency fields on the motor activity of protozoa	Sarapultseva	2014-03-01	RUS	International Journal of Radiation Biology	English	10000				50	0.5 -10	RF Signal Generator	Continuous	Ciliate	Spirostomum ambiguum	Effect	0	1	0	0	0	0	0	0	1	0	0	0	1	0	0	1	0	Y	0	0	0	0	0	0	0	0	0	0	0	0	0	0
1621	Single strand DNA breaks in rat brain cells exposed to microwave radiation	Paulraj	2006-04-11	IND	Mutation Research/Fundamental and Molecular Mechanisms of Mutagenesis	English	16500			1	3449	70	Magnetron	Continuous	Rats	Whole Body	Effect	0	1	0	0	0	0	0	0	1	0	0	0	0	0	0	1	Y	0	0	0	0	0	0	0	0	0	0	0	0	0	0	0
2035	Cytogenetic analysis of the effects of 2.5 and 10.5 GHz microwaves on human lymphocytes	Figueiredo	2004-01-01	BRA	Genetics and Molecular Biology	English	10500			627	NS	0.0111667	Microwave Heating Device	Not Stated	Human	Lymphocytes (blood)	Effect	1	0	0	0	0	0	0	1	0	0	0	0	0	0	1	1	N	0	0	0	Y	0	0	0	0	0	0	Y	0	0	0	0
3575	Effect of Electromagnetic radiation on Lactobacillus species	Garg	2016-07-01	IND	Journal of Chemical and Pharmaceutical Research	English	7500			?	?	0.083 - 0.33	Microwave Klystron Device	Not Stated	Bacteria	Lactobacilllus	Effect	0	1	0	0	0	0	0	0	0	0	0	0	1	0	0	U	0	0	0	0	Y	0	0	0	0	0	0	Y	0	0	0	0
1248	The correlation between the frequency of micronuclei and specific chromosome aberrations in human lymphocytes exposed to microwave radiation in vitro	Garaj-Vrhovac	1992-03-01	HRV	Mutation Research Letters	English	7700				50000-300000	0.5	RF Signal Generator	Continuous	Human	Blood	Effect	1	0	0	0	0	0	0	0	0	0	0	0	0	0	1	1	Y	0	0	0	0	0	0	0	0	0	0	0	0	Y	0	0
2316	Induction of micronuclei in human lymphocytes exposed in vitro to microwave radiation	Zotti-Martelli	2000-12-20	ITA	Mutation Research	English	7700				200000	1	RF Signal Generator	Not Stated	Human	Lymphocytes (blood)	Effect	1	0	0	0	0	0	0	1	0	0	0	0	0	0	1	1	Y	Y	0	0	0	0	0	0	0	0	0	0	0	0	0	0
2320	The effect of microwave radiation on the cell genome	Garaj-Vrhovac	1990-02-01	HRV	Mutation Research	English	7700				300000	0.25	RF Signal Generator	Continuous	Hamster	V79 Fibroblast cells	Effect	1	0	0	0	0	0	0	0	0	0	1	0	0	0	0	1	Y	0	0	0	0	0	Y	0	0	0	0	0	0	0	0	0
2323	The relationship between colony-forming ability, chromosome aberrations and incidence of micronuclei in V79 Chinese hamster cells exposed to microwave radiation	Garaj-Vrhovac	1991-07-01	HRV	Mutation Research	English	7700				5000	1	RF Signal Generator	Continuous	Hamster	V79 Fibroblast cells	Effect	1	0	0	0	0	0	0	0	0	0	1	0	0	0	0	1	Y	0	0	Y	Y	0	0	0	0	0	0	0	0	0	0	0
2278	Non-thermal microwave effects on protein dynamics? An X-ray diffraction study on tetragonal lysozyme crystals	Weissenborn	2005-01-01	DEU	Acta Crystallographica	English	8000				NS	0.17	RF Signal Generator	Continuous	Chicken	Egg White (Lysozyme)	Effect	1	0	0	0	0	0	0	0	0	0	0	0	1	0	0	1	0	Y	0	0	0	0	Y	0	0	0	0	0	0	0	0	0
2152	NF-kappaB DNA-binding activity after high peak power pulsed microwave (8.2 GHz) exposure of normal human monocytes	Natarajan	2002-05-01	USA	Bioelectromagnetics	English	8200			10.8	50000	1.5	RF Signal Generator	Pulsed	Human	Monocytes	Effect	1	0	0	0	0	0	0	0	1	0	0	0	0	0	0	1	0	0	0	0	0	0	0	0	0	0	0	0	Y	0	0	0
2263	Cytogenetic studies in human blood lymphocytes exposed in vitro to 2.45 GHz or 8.2 GHz radiofrequency radiation	Vijayalaxmi	2006-09-01	USA	Radiation Research	English	8200			20.1	100000	2	RF Signal Generator	Pulsed	Human	Lymphocytes	No Effect	1	0	0	0	0	0	0	1	1	0	0	0	0	0	0	1	N	N	0	0	0	0	0	0	0	0	0	0	0	0	0	0
2008	Evidence for a specific microwave radiation effect on the green fluorescent	Copty	2006-08-01	ISR	Biophysical Journal	English	8530			?	NS	NS	Microwave Heating Device	Not Stated	N/A	Green Fluorescent Protein	Effect	1	0	0	0	0	0	0	0	1	0	0	0	0	0	0	0	0	0	0	0	0	0	Y	0	0	0	0	0	0	0	0	0
1998	DNA damage in frog erythrocytes after in vitro exposure to a high peak-power pulsed electromagnetic field	Chemeris	2004-03-01	RUS	Mutation Research	English	8800			1900	NS	0.666667	Microwave Heating Device	Pulsed	Toad	Erythrocytes	Effect	1	0	0	0	0	0	0	1	1	0	0	0	0	0	0	0	Y	0	0	0	0	0	0	0	0	0	0	0	0	0	0	0
1999	Lack of direct DNA damage in human blood leukocytes and lymphocytes after in vitro exposure to high power microwave pulses	Chemeris	2006-04-01	RUS	Bioelectromagnetics	English	8800			1600	NS	0.666667	Microwave Heating Device	Pulsed	Human	Lymphocytes	No Effect	1	0	0	0	0	0	0	1	1	0	0	0	0	0	0	0	N	0	0	0	0	0	0	0	0	0	0	0	0	0	0	0
4028	Genotoxic Effects of amplitude-modulated microwaves on human lymphocytes exposed in vitro under controlled conditions	d'Ambrosio	1995-01-01	ITA	Electromagnetic Biology and Medicine	English	9000			90		0.17	RF Signal Generator	Continuous	Human	Lymphocytes - Peripheral Blood	Effect	1	0	0	0	0	0	0	0	0	0	0	0	0	0	1	0	Y	Y	0	0	0	0	0	0	0	0	0	0	0	0	0	0
4045	Genotoxic Effects of Mitomycin-C and Microwave Radiation on Bovine Lymphocytes	Scarfi	1996-07-07	ITA	ELECTRO- AND MAGNETOBIOLOGY	English	9000			70		0.17	RF Signal Generator	Continuous	Bovine	Lymphocytes - Peripheral Blood	Effect	1	0	0	0	0	0	0	0	1	0	0	0	0	0	0	0	Y	0	0	0	0	0	0	0	0	0	0	Y	0	0	0	0
568	Effects of fetal microwave radiation exposure on offspring behavior in mice	Zhang	2015-03-01	CHN	Journal of Radiation Research	English	9145			2	NS	174	RF Signal Generator	Not Stated	Mice	Offspring (in-utero)	Effect	0	1	0	0	0	0	0	0	1	0	0	0	0	0	0	1	0	0	0	0	0	0	0	0	0	0	0	0	0	0	0	0
2166	Comparative effects of extremely high power microwave pulses and a brief CW irradiation on pacemaker function in isolated frog heart slices	Pakhomov	2000-05-01	USA	Bioelectromagnetics	English	9200			350000		0.00028	Rf Signal Generator	Pulsed	Frog	Heart	Effect	1	0	0	0	0	0	0	1	1	0	0	0	0	0	0	0	0	0	0	0	0	0	0	0	0	0	0	0	0	0	0	0
3270	The effects of radar on avian behavior: Implications for wildlife management at airports	Sheridana	2015-10-01	USA	Applied Animal Behaviour Science	English	9300	9330	9380		10100	0.08	Radar	Pulsed	Bird	Molothrus Ater (Bird)	Effect	0	1	0	0	0	0	0	0	1	0	0	0	0	0	0	1	0	0	0	0	0	0	0	0	0	0	0	0	0	0	0	0
1633	Bone morphogenetic protein expression in newborn rat kidneys after prenatal exposure to radiofrequency radiation	Pyrpasopoulou	2004-04-01	GRC	Bioelectromagnetics	English	9400			0.0005	50	72-96	RF Signal Generator	Pulsed	Rats	Whole Body	Effect	0	1	0	0	0	0	0	0	1	0	0	0	0	0	0	1	0	0	Y	0	0	0	Y	0	0	0	0	0	0	0	0	0
3653	Antibody responses of mice exposed to low-power microwaves under combined, pulse and amplitude modulation	Veyret	1991-01-01	FRA	Bioelectromagnetics	English	9400			0.015	300	50	PEF Pulsed Electric fields	Amplitude Modulation	Mice	Whole Body	Effect	0	1	0	0	0	0	0	0	1	0	0	0	1	0	0	1	0	0	Y	0	0	0	Y	0	0	0	0	0	Y	0	0	0
3948	Effects of low-level microwave radiation on the eye of the crayfish	Munemori	1982-01-01	JPN	Medical and Biological Engineering and Computing	English	9400				2500	0.02	RF Signal Generator	Continuous	Crayfish	Eye	Effect	1	0	0	0	0	0	0	0	0	0	0	0	0	0	1	1	0	0	0	0	0	0	0	0	0	0	0	0	0	0	0	0
3965	Effects of 9.4 GHz microwave exposure on meiosis in mice	Manikowska	1979-03-15	POL	Experientia	English	9400				1000-100000	10	Radar	Pulsed	Mice	Whole Body	Effect	0	1	0	0	0	0	0	1	1	0	0	0	0	0	0	1	Y	0	0	0	0	0	0	0	0	0	0	0	0	0	0	0
1332	Effects Of Microwaves And ELF Magnetic Field On The Phagocytic Activity Of Variously Treated Rat Macrophages	Dasdag	2001-01-01	TUR	Electromagnetic Biology and Medicine	English	9450			1.8	26500	21	RF Signal Generator	Not Stated	Rats	Whole body	Effect	0	1	0	0	0	0	0	0	0	0	0	0	0	0	1	1	0	0	0	0	0	0	0	0	0	0	0	Y	N	0	0	0
2182	Exposure to ELF-pulse modulated X band microwaves increases in vitro human astrocytoma cell proliferation	Perez-Castejon	2009-12-01	ESP	Histology and Histopathology	English	9600			0.0004		0.25 - 24	Rf Signal Generator	Pulsed	Human	Brain Cells (Astrocyte Cell Line)	Effect	1	0	0	0	0	0	0	1	1	0	0	0	0	0	0	1	0	N	Y	Y	N	0	Y	0	0	0	0	0	0	0	0	0
2005	Pulsed electromagnetic field at 9.71 GHz increase free radical production in yeast (Saccharomyces cerevisiae)	Crouzier	2009-05-01	FRA	Pathologie Biologie	English	9710			0.5	NS	0.333333	RF Signal Generator	Continuous	Yeast	Cultures	Effect	0	1	0	0	0	0	0	1	1	0	0	0	0	0	0	1	0	0	0	0	T	0	Y	Y	0	0	0	0	0	0	0	0
3787	Cytogenetic changes induced by low-intensity microwaves in the species Triticum aestivum	Paval	1998-07-01	ROU	Revista medico-chirurgicala a Societatii de Medici si Naturalisti din Iasi.	Romanian/English Abstract	9750			?	Low Dose	?	RF Signal Generator	Not Stated	Wheat	Seeds	Effect	0	1	0	0	0	0	0	0	0	0	0	0	0	0	1	1	Y	Y	0	0	0	0	0	0	0	0	0	0	0	0	0	0
3834	In vivo cytogenetic effect of 9.865 GHz microwave radiation and garlic radioprotection	Zowail	2006-01-01	EGY	Researchgate	English	9865			?	Low Dose	720	RF Signal Generator	Continuous	Rats	Whole Body	Effect	0	1	0	0	0	0	0	0	0	0	0	0	0	0	1	U	Y	0	0	0	0	0	0	0	0	0	0	0	0	0	0	0
1624	Biochemical Changes in Rat Brain Exposed to Low Intensity 9.9 GHz Microwave Radiation	Paulraj	2012-03-17	IND	Cell Biochemistry and Biophysics	English	9900			1	1250	70	RF Signal Generator	Square	Rats	Whole Body	Effect	0	1	0	0	0	0	0	0	0	0	0	0	0	0	1	1	0	0	Y	0	0	0	Y	0	0	0	Y	0	0	0	0	Y
640	Spatial memory and learning performance and its relationship to protein synthesis of Swiss albino mice exposed to 10 GHz microwaves	Sharma	2014-01-01	IND	International Journal of Radiation Biology	English	10000			0.179	250	60	RF Signal Generator	Not Stated	Mice	Whole body	Effect	0	1	0	0	0	0	0	0	0	0	0	0	1	0	0	1	0	0	Y	0	0	0	Y	0	0	0	0	0	0	0	0	0
682	Influence of electromagnetic fields on reproductive system of male rats	Kumar	2012-11-13	IND	International Journal of Radiation Biology	English	10000			0.014	2100	90	RF Signal Generator	Not Stated	Rats	Whole body	Effect	0	1	0	0	0	0	0	0	1	0	0	0	1	0	0	1	Y	Y	0	0	0	Y	Y	0	Y	Y	0	0	0	0	0	0
1239	The effects of microwave frequency electromagnetic fields on the development of Drosophila melanogaster	Atli	2006-06-06	TUR	International Journal of Radiation Biology	English	10000			0.0098	156	3-6	RF Signal Generator	Pulsed	Fly	Drosophila	Effect	0	1	0	0	0	0	0	0	1	0	0	0	0	0	0	1	0	0	0	0	0	0	0	0	Y	0	Y	0	0	0	0	0
1511	Evaluation of genotoxic effects in male Wistar rats following microwave exposure	Kumar	2010-06-01	IND	Indian Journal of Experimental Biology	English	10000			0.14	2140	90	RF Signal Generator	Continuous	Rats	Whole Body	Effect	0	1	0	0	0	0	0	0	1	0	0	0	0	0	0	1	Y	0	0	0	0	Y	Y	0	0	0	0	0	0	Y	0	0
1512	Impact of microwave at X-band in the aetiology of male infertility	Kumar	2012-09-01	IND	Electromagnetic Biology and Medicine	English	10000			0.014	2140	90	RF Signal Generator	Continuous	Rats	Whole Body	Effect	0	1	0	0	0	0	0	0	0	0	0	0	0	0	1	1	0	0	Y	0	0	0	Y	0	Y	Y	0	0	Y	Y	0	0
1513	Influence of microwave exposure on fertility of male rats	Kumar	2011-03-01	IND	Fertility and Sterility	English	10000			0.014	2100	90	RF Signal Generator	Continuous	Rats	Whole Body	Effect	0	1	0	0	0	0	0	0	1	0	0	0	0	0	0	1	0	0	0	0	0	Y	Y	0	Y	0	0	0	0	0	0	0
1673	The change of negative components of the evoked potentials of spinal cord after irradiating of a SHF-waves	Smoliarenko	2008-01-01	RUS	Radiation Biology. Radioecology	English Abstract	10000				16000	0.5	RF Signal Generator	Not Stated	Cats	Spinal Cord	Effect	0	1	0	0	0	0	0	0	0	0	0	0	0	0	1	1	0	0	0	0	0	0	0	Y	0	0	0	0	0	0	0	0
1674	Structural changes in spinal cord neurons after low-intensity SHF-irradiation	Smoliarenko	2009-05-01	RUS	Radiation Biology. Radioecology	Russian/English Abstract	10000				10000	0.5	RF Signal Generator	Not Stated	Cats	Spinal Cord	Effect	0	1	0	0	0	0	0	0	0	0	0	0	0	0	1	1	0	Y	0	0	0	0	Y	Y	0	0	0	0	0	0	0	0
2378	Ten gigahertz microwave radiation impairs spatial memory, enzymes activity, and histopathology of developing mice brain	Sharma	2017-05-01	IND	Molecular and Cellular Biochemistry	English	10000			0.179	2500	30	RF Signal Generator	Continuous	Mice	Whole Body	Effect	0	1	0	0	0	0	0	0	1	0	0	0	1	0	0	1	0	Y	0	0	Y	0	Y	0	0	0	0	0	0	0	0	0
3187	Selective changes in locomotor activity in mice due to low-intensity microwaves amplitude modulated in the EEG spectral domain	Van Eeghem	2017-09-17	BEL	Neuroscience	English	10000			0.27	NS	144	RF Signal Generator	Amplitude Modulation	Mice	Whole Body	Effect	0	1	0	0	0	0	0	0	0	0	0	0	1	0	0	1	0	0	0	0	0	0	0	0	0	0	0	0	0	0	0	0
3646	Microwaves and cellular immunity. I. Effect of whole body microwave irradiation on tumor necrosis factor production in mouse cells	Fesenko	1999-10-01	RUS	Bioelectrochemistry and Bioenergetics	English	10000				10	15	RF Signal Generator	Continuous	Mice	Whole Body	Effect	0	1	0	0	0	0	0	0	1	1	0	0	1	0	0	1	0	0	Y	Y	0	0	Y	0	0	0	0	0	Y	0	0	0
3699	Repeated Exposure to Nanosecond High Power Pulsed Microwaves Increases Cancer Incidence in Rat	De Seze	2020-04-08	FRA	Plos One	English	10000			peak SAR (95MW/kg) - Average SAR 0.34		0.03	RF Signal Generator	Pulsed	Rats	Whole Body	Effect	0	1	0	0	0	0	0	1	1	0	0	0	1	0	0	1	0	0	Y	0	0	0	Y	0	0	0	0	0	Y	0	Y	0
500	The genotoxic effect of radiofrequency waves on mouse brain	Karaca	2011-07-06	TUR	Journal of Neuro-Oncology	English	10715			0.725	84000	18	RF Signal Generator	Continuous	Mice	Brain Cells	Effect	1	0	0	0	0	0	0	0	0	0	0	0	0	0	1	1	Y	Y	Y	0	Y	0	0	0	0	0	0	0	0	0	0	0
2023	Low power microwave interaction with phospholipase C and D signal transduction pathways in myogenic cells	Donato	2004-10-01	ITA	Cell Biology International	English	10750			0.064	45	0.333333	RF Signal Source	Continuous	Rat	Myogenic L6 Cell Line	No Effect	1	0	0	0	0	0	0	0	0	0	0	0	0	0	1	1	0	0	0	0	0	0	N	0	0	0	0	0	0	0	0	N
2181	Demodulation effect is observed in neurones by exposure to low frequency modulated microwaves	Perez-Bruzon	2010-12-01	ESP	Journal of Physics: Conference Series	English	13600			0.0031		NS	Rf Signal Generator	Amplitude Modulation	Molluscs (Snail)	Brain ganglia	Effect	1	0	0	0	0	0	0	1	1	0	0	0	0	0	0	1	0	0	0	0	0	0	0	0	0	0	0	0	0	0	0	0
1625	Enzymatic alterations in developing rat brain cells exposed to a low-intensity 16.5 GHz microwave radiation	Paulraj	2012-08-16	IND	Electromagnetic Biology and Medicine	English	16500			2.01	10000	70	Gunn Diode Source	Amplitude Modulation	Rats	Whole Body	Effect	0	1	0	0	0	0	0	0	1	0	0	0	0	0	0	1	0	0	0	Y	0	Y	Y	0	0	0	0	0	0	0	0	0
855	A Study of the Specific Electromagnetic Effects of Microwave Radiation on Escherichia coli	Shamis	2011-03-04	AUS	Applied and Environmental Microbiology	English	18000				NS	0.05	RF Signal Generator	Not Stated	Bacteria	Escherichia coli	Effect	1	0	0	0	0	0	0	0	0	0	0	1	0	0	1	0	0	Y	0	0	Y	0	0	Y	0	0	0	0	0	0	0	0
2052	Cytogenetic effects of 18.0 and 16.5 GHz microwave radiation on human lymphocytes in vitro	Hansteen	2008-08-01	NOR	ANTICANCER RESEARCH	English	18000				1000	53	RF Signal Generator	Continuous	Human	Lymphocytes (blood)	Effect	1	0	0	0	0	1	0	0	0	0	0	0	0	0	1	1	Y	0	0	0	0	0	0	0	0	0	0	Y	0	0	0	0
3310	Exposure to 18 GHz EMF triggers uptake of large nanosphere clusters by pheochromocytoma cells	Perera	2018-12-10	AUS	International Journal of Nanomedicine	English	18000			1.17	NS	0.01	RF Signal Generator	Not Stated	Rat	PC-12 Cell Lines	Effect	1	0	0	0	0	0	0	0	1	0	0	0	1	0	0	1	0	N	T	T	N	T	0	Y	0	0	0	0	0	0	0	0
3677	Microwave Induced Electroporation of Adherent Mammalian Cells at 18 GHz	Schmidt	2019-06-01	DEU	IEEE	English	18000				NS	0.33	RF Signal Generator	Not Stated	Mice	C2C12 Mouse Cell Lines	Effect	1	0	0	0	0	1	0	0	0	0	0	0	1	0	0	0	0	0	0	0	0	0	0	Y	0	0	0	0	0	0	0	0
2228	Application of intracellular microelectrophoresis to analysis of the influence of the low-level microwave radiation on electrokinetic properties of nuclei in human epithelial cells	Shckorbatov	2002-07-22	UKR	Electrophoresis	English	18750				2000	0.00028 - 0.0166666666666667	RF Signal Generator	Not Stated	Human	Buccal Epithelium Cells	Effect	1	0	0	0	0	0	0	0	0	0	0	0	0	0	1	1	0	0	0	0	0	0	0	Y	0	0	0	0	0	0	0	0
3797	Induced mitogenic activity in AML-12 mouse hepatocytes exposed to low-dose ultra-wideband electromagnetic radiation	Dorsey	2005-04-30	USA	International Journal of Environmental Research and Public Health	English	20000				5000-20000 Kv/m	2	RF Signal Generator	Pulsed	Mice	Hepatocytes	Effect	1	0	0	0	0	0	0	1	1	0	0	0	1	0	0	0	0	0	Y	Y	Y	0	0	0	0	0	0	0	0	0	0	0
1694	Effects of millimeter wave exposure on termite behavior	Tirkel	2011-02-01	AUS	Conference Paper	English	24000			?	1.0 W	NS	RF Signal Generator	Continuous	Termites	Wholebody	Effect	0	1	0	0	0	1	0	1	1	0	0	0	0	0	0	0	0	0	0	0	0	0	0	0	0	0	0	0	0	0	0	0
3798	Genotoxic Effects in Human Fibroblasts Exposed to Microwave Radiation	Franchini	2018-02-20	ITA	Health Physics Society	English	25000			20	8000	0.333333	RF Signal Generator	Continuous	Human	Foetal Foreskin Fibroblasts	Effect	1	0	0	0	0	0	0	1	1	0	0	0	0	0	0	0	Y	Y	Y	0	0	0	Y	0	0	0	0	0	0	0	0	0
2002	Millimeter wave exposure reverses TPA suppression of gap junction intercellular communication in HaCaT human keratinocytes	Chen	2004-01-01	CHN	Bioelectromagnetics	English	30160				10000	1	RF Signal Generator	Continuous	Human	Keratinocytes	Effect	1	0	0	0	0	0	0	0	1	0	0	0	0	0	0	1	0	0	0	0	0	0	0	0	0	0	0	0	0	0	0	Y
3976	Evaluation of the biological effects of police radar RAMER 7F	Rotkovska	1993-06-01	CZE	Brief Reports	English	34000				200	170	RF Signal Generator	Continuous	Mice	Whole Body	Effect	0	1	0	0	0	0	0	1	1	0	0	0	0	0	0	1	0	0	0	0	0	0	0	0	0	0	0	0	Y	Y	0	0
1475	Oxidative stress precedes circulatory failure induced by 35-GHz microwave heating	Kalns	2000-10-01	USA	SHOCK	English	35000			13	750000	0.25 - 0.75	Microwave Heating Device	Continuous	Rats	Whole Body	Effect	0	1	0	0	0	0	0	1	1	0	0	0	0	0	0	0	0	0	0	0	0	0	Y	0	0	0	0	0	0	Y	0	0
1574	Comparison of blood pressure and thermal responses in rats exposed to millimeter wave energy or environmental heat	Millenbaugh	2006-06-01	USA	SHOCK	English	35000				750000	~1.33	RF Signal Generator	Continuous	Rats	Whole Body	Effect	0	1	0	0	0	1	0	1	1	0	0	1	0	0	0	0	0	0	0	0	0	0	0	0	0	0	0	0	0	0	0	0
1575	Gene expression changes in the skin of rats induced by prolonged 35 GHz millimeter-wave exposure	Millenbaugh	2008-03-01	USA	Radiation Research	English	35000				750000	1	RF Signal Generator	Continuous	Rats	Lateral Exposure	Effect	0	1	0	0	0	1	0	1	1	0	0	1	0	0	0	0	0	Y	Y	0	0	0	Y	0	0	0	0	0	Y	0	0	0
1687	Protein changes in macrophages induced by plasma from rats exposed to 35 GHz millimeter waves	Sypniewska	2010-11-12	USA	Bioelectromagnetics	English	35000				750000	0.77	Microwave Heating Device	Continuous	Rats	Left Lateral Exposure	Effect	0	1	0	0	0	1	0	1	1	0	0	1	0	0	0	0	0	0	Y	0	0	0	Y	0	0	0	0	0	Y	0	0	0
1725	EEG changes as heat stress reactions in rats irradiated by high intensity 35 GHz millimeter waves	Xie	2011-06-01	CHN	Radiation Physics	English	35000				5000000	0.00833333	RF Signal Generator	Pulsed	Rats	Back	Effect	0	1	0	0	0	0	0	0	1	0	0	0	0	0	0	0	0	0	0	0	0	0	0	0	0	0	0	0	0	0	0	0
2227	The influence of differently polarised microwave radiation on chromatin in human cells	Shckorbatov	2009-07-03	UKR	International Journal of Radiation Biology	English	35000				300	0.00277667	RF Signal Generator	Not Stated	Human	Buccal Epithelium Cells	Effect	1	0	0	0	0	0	0	0	0	0	0	0	0	0	1	1	P	0	0	0	0	0	0	Y	0	0	0	0	0	0	0	0
2255	Millimeter-wave exposure promotes the differentiation of bone marrow stromal cells into cells with a neural phenotype	Tong	2009-08-07	CHN	J Huazhong Univ Sci Technol	English	36110				100000	0.5	RF Signal Generator	Not Stated	Rats	Bone Marrow Stromal Cells	Effect	1	0	0	0	0	0	0	0	0	0	0	0	0	0	1	1	0	0	Y	0	0	0	Y	0	0	0	0	0	0	0	0	0
2226	Effects of differently polarized microwave radiation on the microscopic structure of the nuclei in human fibroblasts	Shckorbatov	2010-10-09	UKR	Journal of Zhejiang University-SCIENCE B (Biomedicine & Biotechnology)	English	36650				10 - 1000	0.0028	RF Signal Generator	Not Stated	Human	Skin Fibroblast	Effect	1	0	0	0	0	0	0	0	0	0	0	0	0	0	1	1	P	0	0	0	0	0	0	0	0	0	0	0	0	0	0	0
1518	Shielding effect of mineral schungite during electromagnetic irradiation of rats	Kurotchenko	2003-05-20	RUS	Bulletin of Experimental Biology and Medicine,	English	37000				3000	1	RF Signal Generator	Continuous	Rats	Whole Body	Effect	0	1	0	0	0	0	0	0	0	0	0	0	0	0	1	1	0	Y	0	0	0	0	0	0	0	0	0	0	Y	Y	0	0
1683	Effect of rotating electromagnetic fields on proteolytic activity of pepsin in rats	Subbotina	2004-06-01	RUS	Bulletin of Experimental Biology and Medicine	English	37000			?	?	1.5	RF Signal Generator	Not Stated	Rats	Whole Body	Effect	0	1	0	0	0	0	0	0	0	0	0	0	0	0	1	U	0	Y	0	0	Y	y	Y	0	0	0	0	0	0	0	0	0
1684	Effect of delta-rhythm-modulated extremely high frequency	Subbotina	2004-05-08	RUS	Bulletin of Experimental Biology and Medicine	English	37000				3000	2	RF Signal Generator	Modulated	Rats	Whole Body	Effect	0	1	0	0	0	0	0	0	1	0	0	0	0	0	0	1	0	0	0	0	0	0	0	0	0	0	0	0	0	0	0	0
3118	Epitaxy of the bound water phase on hydrophilic surfaces of biopolymers as key mechanism of microwave radiation effects on living objects	Kuznetsov	2017-06-01	RUS	ColloidsandSurfacesB:Biointerfaces	English	37010				4000	1	RF Signal Generator	Not Stated	Bacteria	Escherichia coli with clone luxCDABE genes	Effect	0	1	0	0	0	0	0	0	1	0	0	0	1	0	0	1	0	0	0	0	0	0	Y	Y	0	0	0	0	0	0	0	0
1499	Investigation of acute ocular damage threshold of 40 GHz millimeter wave on rabbit	Kojima	2012-09-28	JPN	IEEE	English	40000				1000000	0.1	RF Signal Generator	Continuous	Rabbit	Eye	Effect	0	1	0	0	0	1	1	0	1	0	0	0	0	0	0	0	0	Y	0	0	0	0	0	0	0	0	0	0	0	0	0	0
2062	Effects of Millimeter-Wave Electromagnetic Radiation on the Experimental Model of Migraine	Sivachenko	2016-02-01	RUS	Bulletin of Experimental Biology and Medicine,	English	40000					0.166667	RF Signal Generator	Frequency Modulation	Rats	Muzzle	Effect	0	1	0	0	0	0	0	0	0	0	0	0	0	0	1	1	0	0	0	0	0	0	0	0	0	0	0	0	0	0	0	0
3625	Long-term exposure to a 40-GHz electromagnetic field does not affect genotoxicity or heat shock protein expression in HCE-T or SRA01/04 cells	Koyama	2019-07-01	JPN	Journal of Radiation Research	English	40000				10000	24	RF Signal Generator	Continuous	Human	HCE-T and SRA01/04 Cell Lines	No Effect	1	0	0	0	0	1	1	0	1	0	0	0	1	0	0	1	T	0	T	0	0	0	Y	0	0	0	0	0	0	0	0	0
3642	Existence of selection rules on helicity during discrete transitions of the genome conformational state of E. coli cells exposed to low-level millimetre radiation	Belyaev	1992-01-01	RUS	Bioelectrochemistry and Bioenergetics	English	41260	41250	41500	0.002	3000	0.17	RF Signal Generator	Not Stated	Bacteria	Escherichia coli	Effect	0	1	0	0	0	0	0	0	0	0	0	0	0	0	1	1	P	0	0	0	0	0	0	0	0	0	0	0	0	0	0	0
1144	Nonthermal Effects of Extremely High-Frequency Microwaves on Chromatin Conformation in Cells in vitro—Dependence on Physical,Physiological, and Genetic Factors	Belyaev	2000-11-11	SWE	IEEE	English	41277	41320	51835		10-12 to 30000	0.1 - 1.0	RF Signal Generator	Not Stated	Bacteria/Rats	Escherichia coli	Effect	1	0	0	0	0	0	0	0	1	0	0	0	1	0	0	1	P	0	0	0	0	0	Y	0	0	0	0	0	0	0	0	0
3937	Regularities of separate and combined effects of circularly polarized millimeter waves on E. coli cells at different phases of culture growth	Belyaev	1993-05-02	RUS	Bioelectrochemistry and Bioenergetics	English	41320				1000	0.08 - 0.17	RF Signal Generator	Not Stated	Bacteria	Escherichia coli	Effect	0	1	0	0	0	0	0	0	0	0	0	0	0	0	1	1	P	0	Y	0	0	0	0	0	0	0	0	0	0	0	0	0
3959	Selection rules on helicity during discrete transitions of the genome conformational state in intact and X-rayed cells of E. coli in millimeter range of electromagnetic field	Belyaev	1992-01-01	RUS	Charge and Field Effects in Biosystems	English	41320	41250	41500		10	0.5	RF Signal Generator	Not Stated	Bacteria	Escherichia coli	Effect	0	1	0	0	0	0	0	0	0	0	0	0	0	0	1	1	P	0	0	0	0	0	0	0	0	0	0	0	0	0	0	0
3059	Evidence for dependence of resonant frequency of millimeter wave interaction with escherichia coli k12 cells on haploid genome length	Belyaev	1993-01-01	RUS	ELECTRO- AND MAGNETOBIOLOGY	English	41324	41280	41370		10-16 - 10-6	0.166667	RF Signal Generator	Not Stated	Bacteria	Escherichia coli	Effect	0	1	0	0	0	0	0	0	0	0	0	0	0	0	1	1	P	0	0	0	0	0	0	0	0	0	0	0	0	0	0	0
3952	Role of field intensity in the biological effectiveness of millimeter waves at a resonance frequency	Pakhomov	1997-01-22	USA	Bioelectrochemistry and Bioenergetics	English	41340				200-26000	0.42	RF Signal Generator	Continuous	Frog	Sciatic Nerve	Effect	1	0	0	0	0	0	0	1	1	0	0	0	0	0	0	1	0	0	0	0	0	0	0	0	0	0	0	0	0	0	0	0
3903	Resonance effect of low-intensity millimeter waves on the chromatin conformational state of rat thymocytes	Belyaev	1994-05-01	RUS	Verlag der Zeitschrift für N aturforschung	English	41610	41560	41670	5	10000	0.17	RF Signal Generator	Not Stated	Rat	Thymocyte Cells	Effect	1	0	0	0	0	0	0	0	0	0	0	0	0	0	1	1	P	0	0	0	0	0	0	0	0	0	0	0	0	0	0	0
4144	Intensity-Dependent and Frequency-Dependent Effects of Microwaves on Cell-Growth Rates	Grundler	1992-06-01	DEU	Bioekctrochemistry and Bioenergetics,	English	41696	41685	41705	0.04	10	NS	RF Signal Generator	Square	Yeast	Saccharomyces cereuisiae)	Effect	0	1	0	0	0	0	0	0	0	0	0	0	0	0	1	1	0	0	0	Y	0	0	0	0	0	0	0	0	0	0	0	0
4148	Mechanisms of electromagnetic interaction with cellular systems	Grundler	1992-12-01	DEU	Natur Wissenschaften	English	41700			0.04	10	NS	RF Signal Generator	Square	Yeast	Saccharomyces cereuisiae)	Effect	0	1	0	0	0	0	0	0	1	0	0	0	1	0	0	1	0	0	0	Y	0	0	0	0	0	0	0	0	0	0	0	0
4149	Resonant Microwave Effect on Locally Fixed Yeast Microcolonies	Grundler	1989-09-01	DEU	Zeitschrift für Naturforschung C	English	41782	41776	41788		10000	NS	RF Signal Generator	Not Stated	Yeast	Saccharomyces cereuisiae)	Effect	0	1	0	0	0	0	0	0	0	0	0	0	1	0	0	1	0	0	0	Y	0	0	0	0	0	0	0	0	0	0	0	0
2203	Immunomodulating action of low intensity millimeter waves on primed neutrophils	Safronova	2002-10-22	RUS	Bioelectromagnetics	English	41950			0.45	195	0.333333	Rf Signal Generator	Continuous	Mice	Neutrophils	Effect	1	0	0	0	0	0	0	0	1	0	1	0	0	0	0	1	0	0	0	0	0	0	Y	0	0	0	0	0	Y	0	0	0
3968	Inhibition of the production of reactive oxygen species in mouse peritoneal neutrophils by millimeter wave radiation in the near and far field zones of the radiator	Gapeyev	1996-06-13	RUS	Bioelectrochemistry and Bioenergetics	English	41950	41750	42150		1 - 2400	0.67	RF Signal Generator	Continuous	Mice	Blood - Neutrophils	Effect	1	0	0	0	0	0	0	0	1	0	1	0	0	0	0	1	0	0	0	0	0	0	Y	0	0	0	0	0	0	0	0	0
3971	Modification of production of reactive oxygen species in mouse peritoneal neutrophils on exposure to low-intensity modulated millimeter wave radiation	Gapeyev	1998-08-17	RUS	Bioelectrochemistry and Bioenergetics	English	41950	41750	42150		500	0.33	RF Signal Generator	Continuous	Mice	Blood - Neutrophils	Effect	1	0	0	0	0	0	0	0	1	0	1	0	0	0	0	1	0	0	0	0	0	0	Y	0	0	0	0	0	0	0	0	0
1406	Effects of low-intensity extremely high frequency electromagnetic radiation on chromatin structure of lymphoid cells in vivo and in vitro	Gapeev	2003-02-01	RUS	Radiation biology. Radioecology	Russian/English Abstract	42000				1500	0.333333	mmWave generator	Continuous	Mice/Human	Whole body/Blood	Effect	1	1	0	0	0	0	0	0	0	0	0	0	0	0	1	1	P	0	0	0	0	0	0	0	0	0	0	0	Y	Y	0	0
1407	Pharmacological analysis of anti-inflammatory effects of low-intensity extremely high-frequency electromagnetic radiation	Gapeev	2006-11-01	RUS	Biofizika	Russian/English Abstract	42000				1000	0.333333	RF Signal Generator	Continuous	Mice	Paw	Effect	0	1	0	0	0	0	0	0	0	0	0	0	0	0	1	1	0	0	0	0	0	0	0	0	0	0	0	0	Th	0	0	0
1502	Suppression of nonspecific resistance of the body under the effect of extremely high frequency electromagnetic radiation of low intensity	Kolomytseva	2002-01-01	RUS	Biofizika/Biophysics	English	42000				1.5e-05	1.65	RF Signal Generator	Not Stated	Mice	Whole Body	Effect	0	1	0	0	0	0	0	0	1	0	0	0	0	0	0	1	0	0	0	0	0	0	0	0	0	0	0	0	Y	Y	0	0
1553	Effect of extremely high frequency electromagnetic radiation of low intensity on parameters of humoral immunity in healthy mice	Lushnikov	2001-07-01	RUS	Biofizika	English	42000				1500	0.67	RF Signal Generator	Not Stated	Rats	Whole Body	Effect	0	1	0	0	0	0	0	0	0	0	0	0	0	0	1	1	0	Y	0	0	0	0	0	0	0	0	0	0	Y	Y	0	0
1554	Effects of low-intensity ultrahigh frequency electromagnetic radiation on inflammatory processes	Lushnikov	2004-04-01	RUS	Bulletin of Experimental Biology and Medicine	English	42000				1000	0.33	RF Signal Generator	Continuous	Mice	Whole Body	Effect	0	1	0	0	0	0	0	0	1	0	0	0	0	0	0	1	0	0	0	0	0	0	0	0	0	0	0	0	Th	0	0	0
2296	A study on biological effects of low-intensity millimeter waves	Yu	2002-08-04	CHN	IEEE	English	42000	41000	43000		320000	0.666667	RF Signal Generator	Not Stated	Bacteria	Escherichia coli	No Effect	0	1	0	0	0	1	0	1	1	0	0	0	0	0	0	0	0	0	0	T	0	0	0	0	0	0	0	0	0	0	0	0
2067	Hydrogen peroxide induced by modulated electromagnetic radiation protects the cells from DNA damage	Gapeyev	2013-04-30	RUS	Central European Journal of Biology	English	42000			1.5	1000	0.333333	RF Signal Generator	Pulsed	Mouse	Blood Leukocytes	Effect	1	0	0	0	0	0	0	0	1	0	0	0	0	0	0	1	0	0	0	0	0	0	Y	0	0	0	0	T	0	0	0	0
1408	Changes in the chromatin structure of lymphoid cells under the influence of low-intensity extremely high-frequency electromagnetic radiation against the background of inflammatory process	Gapeev	2011-07-01	RUS	Biofizika	English	42200			1.5	1000	0.333333	RF Signal Generator	Continuous	Mice	Whole body	Effect	0	1	0	0	0	0	0	0	0	0	0	0	0	0	1	1	Th	0	0	0	0	0	0	0	0	0	0	0	0	0	0	0
1409	Responses of thymocytes and splenocytes to low-intensity extremely high-frequency electromagnetic radiation in normal mice and in mice with systemic inflammation	Gapeev	2010-12-02	RUS	Biofizika	English	42200			1.5	1000	0.333333	RF Signal Generator	Continuous	Mice	Whole body	Effect	0	1	0	0	0	0	0	0	1	0	0	0	0	0	0	1	0	0	Y	0	0	0	Y	0	0	0	0	0	Th	0	0	0
1410	Anti-inflammatory effects of low-intensity extremely high-frequency electromagnetic radiation: frequency and power dependence	Gapeev	2007-11-28	RUS	Bioelectromagnetics	English	42200	37500	70000	1.5	1000	0.333333	RF Signal Generator	Continuous	Mice	Paw	Effect	0	1	0	0	0	0	0	0	1	0	0	0	0	0	0	1	0	0	0	0	0	0	0	0	0	0	0	Y	Y	0	0	0
1539	Effects of milimeter wave radiation on catalase activity	Logani	2002-09-12	USA	ELECTROMAGNETIC BIOLOGY AND MEDICINE	English	42200			622	310000	7.5	RF Signal Generator	Continuous	Mice	Mid back	No Effect	0	1	0	0	0	0	0	0	0	0	1	0	0	0	0	0	0	0	0	0	0	0	0	0	0	0	0	0	T	0	0	0
1540	Effect of millimeter waves on cyclophosphamide induced suppression of the immune system	Logani	2002-12-01	USA	Bioelectromagnetics	English	42200			622	310000	1.5	RF Signal Generator	Continuous	Mice	Nose	No Effect	0	1	0	0	0	0	0	0	1	0	0	0	0	0	0	0	0	0	0	0	0	0	0	0	0	0	0	0	T	0	0	0
1541	Combined millimeter wave and cyclophosphamide therapy of an experimental murine melanoma	Logani	2004-09-16	USA	Bioelectromagnetics	English	42200			730	365000	1.5	RF Signal Generator	Continuous	Mice	Nose	No Effect	0	1	0	0	0	0	0	0	1	0	0	0	0	0	0	0	0	0	0	0	0	0	0	0	0	0	0	0	N	0	0	0
1542	Effect of millimeter waves on cyclophosphamide induced NF-kappaB	Logani	2009-07-07	USA	Electromagnetic Biology and Medicine	English	42200			730	365000	1.5	RF Signal Generator	Continuous	Mice	Nose	Effect	0	1	0	0	0	0	0	0	1	0	0	0	0	0	0	0	0	0	0	0	0	0	0	0	0	0	0	0	Th	0	0	0
1543	Effect of millimeter wave irradiation on tumor metastasis	Logani	2006-05-01	USA	Bioelectromagnetics	English	42200			730	365000	0.5	RF Signal Generator	Continuous	Mice	Nose	Effect	0	1	0	0	0	0	0	0	1	0	0	0	0	0	0	0	0	0	0	0	0	0	0	0	0	0	0	0	Th	0	0	0
1556	Effect of millimeter waves on cyclophosphamide induced suppression of T cell functions	Makar	2003-06-16	USA	Bioelectromagnetics	English	42200			622	310000	1.5	RF Signal Generator	Continuous	Mice	Nose	Effect	0	1	0	0	0	0	0	0	1	0	0	0	0	0	0	0	0	0	Y	Y	0	0	Y	0	0	0	0	0	Th	0	0	0
1558	Effect of millimeter waves on natural killer cell activation	Makar	2005-01-01	USA	Bioelectromagnetics	English	42200			622	310000	1.5	RF Signal Generator	Modulated	Mice	Nose	Effect	0	1	0	0	0	0	0	0	1	0	0	0	0	0	0	0	0	0	Y	0	0	0	Y	0	0	0	0	0	Th	0	0	0
1576	Effects of the action of microwave-frequency electromagnetic radiation on the spike activity of neurons in the supraoptic nucleus of the hypothalamus in rats	Minasyan	2007-02-01	ARM	Neuroscience and Behavioral Physiology,	English	42200				1900	0.67	RF Signal Generator	Continuous	Rats	Head	Effect	0	1	0	0	0	1	0	0	0	0	0	0	0	0	1	1	0	0	0	0	0	0	0	0	0	0	0	0	0	0	0	0
1712	Micronuclei in peripheral blood and bone marrow cells of mice exposed to 42 GHz electromagnetic millimeter waves	Vijayalaxmi	2004-03-01	USA	RADIATION RESEARCH	English	42200			622	315000	1.5	Microwave Heating Device	Sinusoidal	Mice	Nose Exposure	No Effect	0	1	0	0	0	0	0	1	1	0	1	0	0	0	0	0	N	N	0	0	0	0	0	0	0	0	0	0	0	N	0	0
1968	Evaluation of the potential in vitro antiproliferative effects of millimeter waves at some therapeutic frequencies on RPMI 7932 human skin malignant melanoma cells	Beneduci	2009-09-01	ITA	Cell Biochemistry and Biophysics	English	42200				1100	4	RF Signal Generator	Continuous	Human	RPMI 7932 Melanoma Cell Line	No Effect	1	0	0	0	0	0	0	0	0	0	1	0	0	0	0	1	0	0	0	T	0	0	0	0	0	0	0	0	0	0	0	0
3017	Antiepileptic effects of short-wave radiation in hypogeomagnetic conditions	Godlevsky	2013-08-01	UKR	Central European Journal of Medicine	English	42200				1000	0.0833333	RF Signal Generator	Amplitude Modulation	Rats	Brain	Effect	0	1	0	0	0	0	0	0	0	0	0	0	0	0	1	1	0	0	0	0	0	0	0	0	0	0	0	0	0	0	0	0
267	Microwave irradiation influences on the state of human cell nuclei	Shckorbatov	1999-01-06	UKR	Bioelectromagnetics	English	42200				2000	0.0003 - 0.02	RF Signal Generator	Not Stated	Human	Buccal Epithelium	Effect	1	0	0	0	0	0	0	0	0	0	0	0	0	0	1	1	P	0	0	0	0	0	0	Y	0	0	0	0	0	0	0	0
3958	Pulse-modulated Electromagnetic Radiation of Extremely High Frequencies Protects Cellular DNA against Damaging Effect of Physico-Chemical Factors in vitro	Gapeyev	2015-09-01	RUS	Biofizika	English	42200			1.5	1000	0.33	RF Sginal Generator	Pulsed	Mice	Peripheral Blood Leukocytes	Effect	1	0	0	0	0	0	0	0	0	0	0	0	0	0	1	1	Th	0	0	0	0	0	0	0	0	0	0	0	0	0	0	0
3972	The role of fatty acids in anti-inflammatory effects of low-intensity extremely high-frequency electromagnetic radiation	Gapeyev	2011-02-01	RUS	Bioelectromagnetics	English	42200			1.5	1000	0.33	RF Signal Generator	Continuous	Mice	Thymic Cells	Effect	0	1	0	0	0	0	0	0	1	0	0	0	0	0	0	1	0	0	0	0	0	0	Y	0	0	0	0	0	0	0	0	0
3973	Exposure of tumor-bearing mice to extremely high-frequency electromagnetic radiation modifies the composition of fatty acids in thymocytes and tumor tissue	Gapeyev	2013-08-01	RUS	International Journal of Radiation Biology	English	42200			1.5	1000	1.65	RF Signal Generator	Continuous	Mice	Whole Body	Effect	0	1	0	0	0	0	0	0	0	0	0	0	0	0	1	1	0	0	0	0	0	0	Y	0	0	0	0	0	Y	0	Th	0
3974	Modifying effects of low-intensity extremely high-frequency electromagnetic radiation on content and composition of fatty acids in thymus of mice exposed to X-rays	Gapeyev	2015-01-30	RUS	International Journal of Radiation Biology	English	42200			1.5	1000	0.33	RF Signal Generator	Pulsed	Mice	Whole Body	Effect	0	1	0	0	0	0	0	0	1	0	0	0	0	0	0	1	0	0	0	0	0	0	0	0	0	0	0	Y	T	0	0	0
4136	Features of anti-inflammatory effects of modulated extremely high-frequency electromagnetic radiation	Gapeyev	01/09/2009	RUS	Bioelectromagnetics	English	42200				700-7000	0.33333	RF Signal Generator	Pulsed	Mice	Whole body	Effect	0	1	0	0	0	0	0	0	1	0	0	0	0	0	0	1	0	0	0	0	0	0	0	0	0	0	0	0	Y	0	0	0
1754	Local heating of human skin by millimeter waves: effect of blood flow	Alekseev	2005-09-01	USA	Bioelectromagnetics		42250				2080000	0.17	Microwave Heating Device	Continuous	Human	Forearm	Effect	0	0	0	1	0	0	0	0	0	0	1	0	0	0	0	0	0	0	0	0	0	0	0	0	0	0	0	0	0	0	0	0
2244	Millimeter wave induced reversible externalization of phosphatidylserine molecules in cells exposed in vitro	Szabo	2006-01-25	USA	Bioelectromagnetics	English	42250				5500	0.5	mm Wave generator	Continuous	Human	Lymphocytes and Monocytes (Blood)	Effect	1	0	0	0	0	0	0	0	1	0	0	0	0	0	0	1	0	0	0	0	0	0	0	Y	0	0	0	0	0	Y	0	0
3960	Dual effects of microwaves on single Ca2+-activated K + channels in cultured kidney cells Vero	Geletyuk	1995-02-06	RUS	FEBS Letters	English	42250				1000	0.33	RF Signal Generator	Continuous	Monkey	Kidney (Vero) Cells	Effect	1	0	0	0	0	0	0	0	1	0	1	0	0	0	0	1	0	0	0	0	0	0	0	Y	0	0	0	0	0	0	0	0
3967	Effects of millimeter-wave electromagnetic exposure on the morphology and function of human cryopreserved spermatozoa	Volkova	2013-06-13	UKR	BIOPHYSICS AND BIOCHEMISTRY	English	42250				300	0.08 - 0.25	RF Signal Generator	Not Stated	Human	Semen Samples	Effect	1	0	0	0	0	0	0	0	0	0	0	0	0	0	1	1	Y	0	0	0	0	0	0	Y	Y	0	0	0	0	0	0	0
1742	Morphological changes in skin nerves caused by electromagnetic radiation of the millimeter range	Zavgorogny	2000-01-01	RUS	Critical Reviews in Biomedical Engineering	English	42500				500000	0.25	Microwave Heating Device	Not Stated	Mice	Whole Body	Effect	0	1	0	0	0	0	0	0	0	0	0	0	0	0	1	0	0	Y	0	0	Y	0	0	0	0	0	0	0	0	0	0	0
3763	Biological oxidation in cells exposed to microwaves in the millimeter range	Zaliubovskaia	1978-05-31	RUS	TSitologiia i genetika	Russian/English Abstract	46000				10000	0	RF Signal Generator	Not Stated	Human	Cell Lines	Effect	1	0	0	0	0	0	0	0	0	0	0	0	0	0	1	1	0	0	0	Y	0	Y	Y	0	0	0	0	0	0	0	0	0
1482	Microwave Exposure Affecting Reproductive System in Male Rats	Kesari	2009-09-19	IND	Applied Biochemistry and Biotechnology	English	50000			0.0008	8.6	90	RF Signal generator	Continuous	Rats	Whole Body	Effect	0	1	0	0	0	0	0	0	1	0	0	0	0	0	0	1	0	0	0	0	0	Y	Y	0	Y	0	0	0	0	0	0	0
1483	Fifty-gigahertz microwave exposure effect of radiations on rat brain	Kesari	2009-07-01	IND	Applied Biochemistry and Biotechnology	English	50000			0.0008	8.6	90	RF Signal Generator	Continuous	Rats	Whole Body	Effect	0	1	0	0	0	0	0	0	1	0	0	0	0	0	0	1	Y	0	0	0	0	Y	Y	0	0	0	0	0	0	0	0	0
2029	Denaturation of hen egg white lysozyme in electromagnetic fields: a molecular	English	2007-03-06	GBR	THE JOURNAL OF CHEMICAL PHYSICS	English	50000				NS	NS	Simulation	Not Stated	Chicken	Egg White (Lysozyme)	Effect	0	0	0	0	0	0	0	0	0	0	0	0	0	0	1	1	0	0	0	0	0	0	Y	0	0	0	0	0	0	0	0	0
3899	Power-dependent rearrangement in the spectrum of resonance effect of millimeter waves on the genome conformational state of escherzchu colz cells	Shcheglov	1997-07-07	RUS	ELECTRO- AND MAGNETOBIOLOGY	English	51675	51665	51688		1x10-17 - 30000	0.17	RF Signal Generator	Not Stated	Bacteria	Escherichia coli K12 Strain	Effect	0	1	0	0	0	0	0	0	1	0	0	0	1	0	0	1	P	0	0	0	0	0	0	0	0	0	0	0	0	0	0	0
3004	Combined Effects of Circularly Polarized Microwaves and Ethidium Bromide on E. coli CELLS	Ushakov	1999-01-01	RUS	ELECTRO- AND MAGNETOBIOLOGY	English	51755				1000	0.166667	RF Signal Generator	Continuous	Bacteria	Escherichia coli	Effect	0	1	0	0	1	0	0	0	1	0	0	0	1	0	0	1	P	0	0	0	0	0	0	0	0	0	0	0	0	0	0	0
3900	Resonance Effect of MillimeterWaves in the Power Range From 10-19 to 3x10-3 W/cm2 on Escherichia coli Cells at Different Concentrations	Belyaev	1996-01-01	RUS	Bioelectromagnetics	English	51755	51640	51850		10-18 to 30000	0.17	RF Signal Generator	Not Stated	Bacteria	Escherichia coli	Effect	0	1	0	0	0	0	0	0	1	0	0	0	1	0	0	1	P	0	0	0	0	0	0	0	0	0	0	0	0	0	0	0
3641	Cooperative Response of Escherichia Coli Cells to the Resonance Effect of Millimeter Waves at Super Low Intensity	Belyaev	1994-12-01	RUS	Electro- and Magnetobiology	English	51760				10-16 to 1000	1.16667	RF Signal Generator	Not Stated	Bacteria	Escherichia coli K12 Strain	Effect	0	1	0	0	0	0	0	0	0	0	0	0	0	0	1	1	P	0	0	Y	0	0	0	0	0	0	0	0	0	0	0	0
3905	Resonance Effect of Microwaves on the Genome Conformational State of E. coli Cells	Belyaev	1992-07-01	RUS	Verlag der Zeitschrift für Naturforschung	English	51760	51620	51840	17-22	30000	0.5	RF Signal Generator	Not Stated	Bacteria	Escherichia coli	Effect	0	1	0	0	0	0	0	0	0	0	0	0	0	0	1	1	P	0	0	0	0	0	0	0	0	0	0	0	0	0	0	0
2225	Cell-to-cell communication in response of E. coli cells at different phases of growth to low-intensity microwaves	Shcheglov	2002-08-01	RUS	Biochimica et Biophysica Acta	English	51775				10-17 - 10000	0.17	RF Signal Generator	Not Stated	Bacteria	Escherichia coli K12 Strain	Effect	0	1	0	0	0	0	0	0	1	0	0	0	0	0	0	1	P	0	0	0	0	0	0	0	0	0	0	0	0	0	0	Y
3924	The distinguishing effects of low-intensity electromagnetic radiation of different extremely high frequencies on Enterococcus hirae: growth rate inhibition and scanning electron microscopy analysis	Hovnanyan	2017-06-06	ARM	Letter in Applied Microbiology	English	51800				600	0.5 -2	RF Signal Generator	Continuous	Bacteria	Enterococcus hirae	Effect	0	1	0	0	0	1	0	0	1	0	0	0	0	0	0	1	0	Y	0	Y	0	0	0	Y	0	0	0	0	0	0	0	0
3928	Comparable effects of low-intensity electromagnetic irradiation at the frequency of 51.8 and 53 GHz and antibiotic ceftazidime on Lactobacillus acidophilus growth and survival	Soghomonyan	2013-03-21	ARM	Cell Biochemistry and Biophysics	English	51800				600	1	RF Signal Generator	Amplitude Modulation	Bacteria	Lactobacillus acidophilus	Effect	0	1	0	0	0	0	0	0	1	0	0	0	0	0	0	1	0	0	0	Y	Y	0	0	Y	0	0	0	T	0	0	0	0
3929	Extremely high frequency electromagnetic radiation enforces bacterial effects of inhibitors and antibiotics	Tadevosyan	2008-01-01	ARM	Cell Biochemistry and Biophysics	English	51800				600	0.5-1	RF Signal Generator	Amplitude Modulation	Bacteria	Escherichia coli (Strain K12) - wild type	Effect	0	1	0	0	0	1	0	0	1	0	0	0	0	0	0	1	0	0	0	Y	Y	Y	Y	Y	0	0	0	Y	0	0	0	0
3931	Escherichia coli Growth Changes by the Mediated Effects After Low-Intensity Electromagnetic Irradiation of Extremely High Frequencies	Torgomyan	2012-10-18	ARM	Cell Biochemistry and Biophysics volume	English	51800				600	1	RF Signal Generator	Amplitude Modulation	Bacteria	Escherichia coli (Strain K12) - wild type	Effect	0	1	0	0	0	0	0	0	1	0	0	0	0	0	0	1	0	Y	0	Y	0	0	Y	Y	0	0	0	0	0	0	0	0
3932	Electromagnetic irradiation of Enterococcus hirae at low-intensity 51.8- and 53.0-GHz frequencies: changes in bacterial cell membrane properties and enhanced antibiotics effects	Torgomyan	2012-04-01	ARM	FEMS Microbiology Letters	English	51800				600	1	RF Signal Generator	Amplitude Modulation	Bacteria	Enterococcus hirae	Effect	0	1	0	0	0	1	0	0	1	0	0	0	0	0	0	1	0	0	0	Y	0	Y	Y	Y	0	0	0	0	0	0	0	0
1969	Antiproliferative effect of millimeter radiation on human erythromyeloid leukemia cell line K562 in culture: ultrastructural- and metabolic-induced changes	Beneduci	2007-05-01	ITA	Bioelectrochemistry	English	53370				10	4	Microwave	Continuous	Human	Erythromyeloid Leukemia Cell Line	Effect	1	0	0	0	0	0	0	0	1	0	1	0	0	0	0	1	0	Y	0	Th	N	Y	T	0	0	0	0	0	0	0	0	0
2021	Permeability Changes of Cationic Liposomes Loaded with Carbonic Anhydrase Induced by Millimeter Waves Radiation	Di Donato	2012-11-01	ITA	Radiation Research	English	53370			0.266	1000	0.0333333	RF Signal Source	Continuous	N/A	Liposomes and Carbonic Anhydrase	Effect	1	0	0	0	0	0	0	0	1	0	0	0	0	0	0	1	0	0	0	0	0	0	0	Y	0	0	0	0	0	0	0	0
2195	The response of giant phospholipid vesicles to millimeter waves radiation	Ramundo-Orlando	2009-07-01	ITA	Biochimica et Biophysica Acta	English	53370			0.1 - 0.5	1000	0.17	Rf Signal Generator	Not Stated	Unknown	Lipid Vesicles (Egg Yolk)	Effect	1	0	0	0	0	0	0	0	1	0	0	0	0	0	0	1	0	Y	0	0	0	0	0	Y	0	0	0	0	0	0	0	0
3372	Induced movements of giant vesicles by millimeter wave radiation	Albini	2014-07-01	ITA	Biochimica et Biophysica Acta	English	53370			0.2	NS	0.17	RF Signal Generator	Continuous	Chicken	Egg Yolk	Effect	1	0	0	0	0	0	0	0	1	0	0	0	1	0	0	1	0	0	0	0	0	0	0	0	0	0	0	0	0	0	0	0
3962	Extremely High Frequency Electromagnetic Fields Facilitate Electrical Signal Propagation by Increasing Transmembrane Potassium Efflux in an Artificial Axon Model	D’Agostino	2018-06-18	ITA	Scientific Reports	English	53370			1.1		0.5	RF Signal Generator	Not Stated	N/A	Lipid Vesicle	Effect	1	0	0	0	0	1	0	0	0	0	0	0	0	0	1	1	0	0	0	0	0	0	Y	Y	0	0	0	0	0	0	0	0
1961	Lethal effect of electromagnetic radiation of the millimeter wavelength range on cell cultures of chicken embryo	Badzhinyan	2001-03-01	ARM	Doklady Biochemistry and Biophysics	English	53534				100000	0.133333	Microwave Heating Device	Not Stated	Chicken	Embryo Cells	Effect	1	0	0	0	0	0	0	0	0	0	0	0	0	0	1	1	0	Y	0	T	Y	0	0	0	0	0	0	0	0	0	0	0
1599	Inhibitory action of microwave radiation on gamma-glutamyl transpeptidase activity in liver of rats treated with hydrocortisone	Olchowik	2000-01-01	AUT	Folia Histochemica et Cytobiologica	English	53570				10000-100000	10 (20 min/day for 30 days - KK)	RF Signal Generator	Not Stated	Rats	Liver	Effect	0	1	0	0	0	0	0	0	0	0	0	0	0	0	1	1	0	0	0	0	0	Y	0	0	0	0	0	0	0	0	0	0
1276	Biological effects of millimeter-wave irradiation on mice -- preliminary results	Bellossi	2000-11-11	FRA	IEEE	English	60000			0.31	5100	10+	RF Signal Generator	Not Stated	Mice	Whole body	Effect	0	1	0	0	0	1	0	0	0	0	0	0	0	0	1	1	0	0	0	0	0	0	0	0	0	0	0	0	0	0	Y	0
1497	The Acute Effects of Millimeter–Wave Exposure to the Eye	Kojima	2005-05-01	JPN	Investigative Ophthalmology & Visual Science	English Abstract	60000				NS	0.05	RF Signal Generator	Continuous	Rabbit	Eye	Effect	0	1	0	0	0	1	0	0	0	0	0	0	0	0	1	0	0	Y	0	0	0	0	0	0	0	0	0	0	Y	0	0	0
1500	Acute ocular injuries caused by 60-Ghz millimeter-wave exposure	Kojima	2009-09-01	JPN	Health Physics	English	60000				18980000	0.1	RF Signal Generator	Continuous	Rabbit	Eye	Effect	0	1	0	0	0	1	1	0	1	0	0	0	0	0	0	0	0	Y	0	0	0	0	0	0	0	0	0	0	0	0	0	0
2139	The simulation of the cooperative effect of development in a culture of early mouse embryos after irradiation with electromagnetic waves in the millimeter range	Mezhevikina	2000-01-01	RUS	Ontogenez	English	60000	54000	78000		600	1	RF Signal Generator	Continuous	Mice	Ebryonic Cells	Effect	1	0	0	0	0	0	0	0	0	0	0	0	0	0	1	1	0	0	0	Y	0	0	0	0	0	0	0	0	0	0	0	0
2155	Study of narrow band millimeter-wave potential interactions with endoplasmic reticulum stress sensor genes	Nicolaz	2009-03-09	FRA	Bioelectromagnetics	English	60000	59.1	61.2	2.64	900 - 1400	24	Rf Signal Generator	Continuous	Human	Cancer Cells (U251 MG)	No Effect	1	0	0	0	0	1	0	0	1	0	0	1	0	0	0	1	0	0	N	0	0	0	N	0	0	0	0	0	0	0	0	0
2304	Interactions between 60-GHz millimeter waves and artificial biological membranes: dependence on radiation parameters	Zhadobov	2006-06-19	FRA	IEEE	English	60000				4100-9000	5	RF Signal Generator	Various	N/A	Artificial Phospholipid Monolayer	Effect	1	0	0	0	0	1	0	0	0	0	0	1	0	0	0	1	0	N	0	0	0	0	0	N	0	0	0	0	0	0	0	0
2305	Low-power millimeter wave radiations do not alter stress-sensitive gene expression of chaperone proteins	Zhadobov	2006-11-01	FRA	Bioelectromagnetics	English	60000				5400	33	Transverse Electromagnetic (TEM) Cell	Amplitude Modulation	Human	Brain Cancer (U251) Cell Line	No Effect	1	0	0	0	0	1	0	0	0	0	0	1	0	0	0	1	0	0	N	0	0	0	N	0	0	0	0	0	0	0	0	0
2443	Effects of Long-Term Exposure to 60 GHz Millimeter-Wavelength Radiation on the Genotoxicity and Heat Shock Protein (Hsp) Expression of Cells Derived from Human Eye	Koyama	2016-08-08	JPN	International Journal of Environmental Research and Public Health	English	60000				10000	24	RF Signal Generator	Not Stated	Human	Corneal Epithelia HCE-T Cell Line	No Effect	1	0	0	0	0	1	1	0	1	0	0	0	0	0	0	1	N	0	T	0	0	0	T	0	0	0	0	0	0	0	0	0
3927	Effect of Two-times 24 hour Exposures to 60 GHz Millimeter-waves on Neurite Outgrowth in PC12VG Cells in Consideration of Polarization	Shiina	2014-12-29	JPN	IEEE	English	60000				10000	24	RF Signal Generator	Continuous	Rat	Pheochromocytoma (PC-12) Cell Line	Uncertain Effect	1	0	0	0	0	1	1	0	1	0	0	0	0	0	0	1	0	0	0	T	0	0	0	0	0	0	0	0	0	0	0	0
3941	60 GHz electromagnetic fields do not activate stress-sensitive gene expression	Zhadobov	2005-06-15	FRA	IEEE	English	60000				2700	1 - 33 Hours	RF Signal Generator	Continuous	Human	Malignant Glioblastoma U251 Cell Line	No Effect	1	0	0	0	0	1	0	0	0	0	0	0	0	0	1	1	0	0	N	0	0	0	0	0	0	0	0	0	0	0	0	0
3942	Evaluation of the Potential Biological Effects of the 60-GHz Millimeter Waves Upon Human Cell	Zhadobov	2009-08-04	FRA	IEEE	English	60000			21.43	9200	24	RF Signal Generator	Continuous	Human	Aneuploid Immortal Keratinocyte HaCaT Cell Line	No Effect	1	0	0	0	0	1	0	0	1	0	0	0	0	0	0	1	0	0	T	0	T	T	T	0	0	0	0	0	0	0	0	0
3954	Microdosimetry and physiological effects of millimeter wave irradiation in isolated neural ganglion preparation	Romanenko	2013-06-28	USA	IEEE	English	60000				9000 - 144000	0.02	RF Signal Generator	Continuous	Leeches	Retzius Neurons	Effect	1	0	0	0	0	0	0	0	0	0	0	0	0	0	1	1	0	0	0	0	0	0	0	0	0	0	0	0	0	0	0	0
3955	Effects of millimeter wave irradiation and equivalent thermal heating on the activity of individual neurons in the leech ganglion	Romanenko	2014-11-15	USA	Journal of Neurophysiology	English	60000				10000-40000	0.02	RF Signal Generator	Continuous	Leeches	Retzius Neurons	Effect	1	0	0	0	0	1	0	0	0	0	0	1	1	0	0	1	0	0	0	0	0	0	0	T	0	0	0	0	0	0	0	0
3947	Modulation of neuronal activity and plasma membrane properties with low-power millimeter waves in organotypic cortical slices	Pikov	2010-07-19	USA	Journal of Neural Engineering	English	60125				0.3 - 8	0.02	RF Signal Generator	Continuous	Rat	Pyramidal Neuron	Effect	1	0	0	0	0	0	0	0	1	0	0	0	1	0	0	1	0	0	0	0	0	0	0	Y	0	0	0	0	0	0	0	0
3953	Millimeter wave-induced changes in membrane properties of leech Retzius neurons	Pikov	2011-02-18	USA	Photonic Therapeutics and Diagnostics	English	60125				1000-6000	0.02	RF Signal Generator	Continuous	Leeches	Retzius Neurons	Effect	1	0	0	0	0	0	0	0	0	0	0	0	0	0	1	1	0	0	0	0	0	0	0	Y	0	0	0	0	0	0	0	0
575	Transcriptome Analysis Reveals the Contribution of Thermal and the Specific Effects in Cellular Response to Millimeter Wave Exposure	Habauzit	2014-10-10	FRA	Plos One	English	60400			594	200000	3	RF Signal Generator	Not Stated	Human	Keratinocyte Cells	Effect	1	0	0	0	0	1	0	0	1	0	0	0	0	0	0	0	0	0	Y	0	0	0	0	0	0	0	0	0	0	0	0	0
2103	Whole-genome expression analysis in primary human keratinocyte cell cultures exposed to 60 GHz radiation	Le Quement	2011-08-03	FRA	Bioelectromagnetics	English	60400			42.4	18000	1	RF Signal Generator	Continuous	Human	Skin Cells (Primary Cells)	Effect	1	0	0	0	0	1	0	0	1	0	0	1	0	0	0	0	0	0	Y	0	0	0	y	0	0	0	0	0	0	0	0	0
2154	Absence of direct effect of low-power millimeter-wave radiation at 60.4 GHz on endoplasmic reticulum stress	Nicolaz	2008-08-07	FRA	Cell Biology and Toxicology	English	60400				1400	24-72	RF Signal Generator	Not Stated	Human	Cancer Cells (U251 MG)	No Effect	1	0	0	0	0	1	0	0	1	0	0	1	0	0	0	1	0	0	T	0	0	T	T	0	0	0	0	0	0	0	0	0
3378	Effect of acute millimeter wave exposure on dopamine metabolism of NGF-treated PC12 cells	Hass	2017-07-01	FRA	Journal of Radiation Research	English	60400				50000	24	mm Wave generator	Continuous	Rat	PC-12 Cell Lines	Uncertain Effect	1	0	0	0	0	1	0	0	1	0	0	0	0	0	0	1	0	0	N	0	0	0	T	0	0	0	0	0	0	0	0	0
4005	Additive Effects of Millimeter Waves and 2-Deoxyglucose Co-Exposure on the Human Keratinocyte Transcriptome	Mahamoud	2016-08-16	FRA	Plos One	English	60400				200000	3	RF Signal Generator	Not Stated	Human	Neonatal Keratinocytes (Primary Cells)	Effect	1	0	0	0	0	1	0	0	1	0	0	0	0	0	0	1	0	0	T	0	0	0	N	0	0	0	0	Y	0	0	0	0
3926	Effect of millimeter waves on survival of UVC‐exposed Escherichia coli	Rojavin	1995-01-01	USA	Bioelectromagnetic	English	61000			83.7	10000	0.5 /1.5	RF Signal Generator	Continuous	Bacteria	Escherichia coli (Strain K12) - wild type	Effect	0	1	0	0	0	0	0	0	0	0	1	0	0	0	0	1	0	0	0	0	Th/T	0	0	0	0	0	0	0	0	0	0	0
2245	Low power millimeter wave irradiation exerts no harmful effect on human keratinocytes in vitro	Szabo	2003-03-12	USA	Bioelectromagnetics	English	61200			770	290000	0.5	mm Wave generator	Continuous	Human	HaCaT Keratinocyte (Skin) Cell Line	Effect	1	0	0	0	0	0	0	0	1	0	0	0	0	0	0	0	0	0	N	0	Y/N	0	N	0	0	0	0	0	0	0	0	0
1557	Effect of cyclophosphamide and 61.22 GHz millimeter waves on T-cell, B-cell, and macrophage functions	Makar	2006-09-01	USA	Bioelectromagnetics	English	61220			885	310000	1.5	RF Signal Generator	Continuous	Mice	Nose	Effect	0	1	0	0	0	0	0	0	1	0	0	0	0	0	0	0	0	0	Y	Y	0	0	Y	0	0	0	0	0	Th	0	0	0
1634	Single millimeter wave treatment does not impair gastrointestinal transit in mice	Radzievsky	2002-08-30	USA	Life Sciences	English	61220				150000	0.25	RF Signal Generator	Not Stated	Rats	Nose	No Effect	0	1	0	0	0	0	0	0	1	0	1	0	0	0	0	1	0	0	0	0	0	0	0	0	0	0	0	0	0	0	0	0
1635	Electromagnetic millimeter wave induced hypoalgesia: frequency dependence and involvement of endogenous opioids	Radzievsky	2008-05-01	USA	Bioelectromagnetics	English	61220				133000	0.25	RF Signal Generator	Not Stated	Mice	Nose	Effect	0	1	0	0	0	0	0	0	1	0	0	0	0	0	0	1	0	0	0	0	0	0	Th	0	0	0	0	0	0	0	0	0
1636	Millimeter wave-induced suppression of B16 F10 melanoma growth in mice: involvement of endogenous opioids	Radzievsky	2004-09-01	USA	Bioelectromagnetics	English	61220				133000	0.25	RF Signal Generator	Not Stated	Mice	Nose	Effect	0	1	0	0	0	0	0	0	1	0	1	0	0	0	0	1	0	0	0	0	0	0	0	0	0	0	0	0	0	Th	0	0
1637	Hypoalgesic effect of millimeter waves in mice: dependence on the site of exposure	Radzievsky	2000-04-14	USA	Life Sciences	English	61220				150000	0.25	RF Signal Generator	Not Stated	Mice	Nose	Effect	0	1	0	0	0	0	0	0	0	0	1	0	0	0	0	1	0	0	0	0	0	0	0	0	0	0	0	0	0	0	0	0
1638	Peripheral neural system involvement in hypoalgesic effect of electromagnetic millimeter waves	Radzievsky	2001-01-26	USA	Life Sciences	English	61220				150000	0.25	RF Signal Generator	Not Stated	Mice	Foot Pad	Effect	0	1	0	0	0	0	0	0	0	0	1	0	0	0	0	1	0	0	0	0	0	0	0	0	0	0	0	0	0	0	0	0
2246	Reactions of keratinocytes to in vitro millimeter wave exposure	Szabo	2001-07-01	USA	Bioelectromagnetics	English	61220			770	290000	0.25 - 0.5	mm Wave generator	Continuous	Human	HaCaT Keratinocyte (Skin) Cell Line	Effect	1	0	0	0	0	0	0	0	0	0	1	0	0	0	0	0	0	0	Y	T	0	0	Y	0	0	0	0	0	Y	0	0	0
4141	Antipruritic effect of millimeter waves in mice: evidence for opioid involvement	Rojavin	1998-09-25	USA	Pharmacology Letters	English	61222				150000	0.25	RF Signal Generator	Continuous	Mice	Swiss Albino - nose	Effect	0	1	0	0	0	0	0	0	0	1	0	0	0	0	0	1	0	0	0	0	0	0	0	0	0	0	0	0	0	0	0	0
4142	Pain relief caused by millimeter waves in mice: results of cold water tail flick tests	Rojavin	2000-04-01	USA	International Journal of Radiation Biology	English	61222				1500 - 50000	0.25	RF Signal Generator	Continuous	Mice	Swiss Albino - nose	Effect	0	1	0	0	0	0	0	0	0	1	0	0	0	0	0	1	0	0	0	0	0	0	0	0	0	0	0	0	0	0	0	0
4145	Electromagnetic millimeter waves increase the duration of anaesthesia caused by ketamine and chloral hydrate in mice	Rojavin	1997-10-01	USA	International Journal of Radiation Biology	English	61222			4.2 - 420	1500 - 150000	0.25	RF Signal Generator	Not Stated	Mice	BALB/c	Effect	0	1	0	0	0	0	0	0	0	1	0	0	0	0	0	1	0	0	0	0	0	0	0	0	0	0	0	0	0	0	0	0
488	Influence of low intensity coherent electromagnetic millimeter radiation (EMR) on aqua solution of DNA	Kalantaryan	2010-01-01	ARM	Progress In Electromagnetics Research Letters	English	64500				500	0.5-2	RF Signal Generator	Amplitude Modulation	Bovine	Thymus DNA	Effect	1	0	0	0	0	0	0	0	0	0	0	0	0	0	1	1	0	0	0	0	0	0	Y	0	0	0	0	0	0	0	0	0
2256	Low intensity electromagnetic irradiation with 70.6 and 73 GHz frequencies affects Escherichia coli growth and changes water properties	Torgomyan	2011-07-01	ARM	Cell Biochemistry and Biophysics	English	70600				600	2	RF Signal Generator	Amplitude Modulation	Bacteria	Escherichia coli	Effect	0	1	0	0	0	1	0	0	1	0	0	0	0	0	0	1	0	0	0	Y	Y	0	Y	0	0	0	0	0	0	0	0	0
3930	Low-intensity electromagnetic irradiation of 70.6 and 73 GHz frequencies enhances the effects of disulfide bonds reducer on Escherichia coli growth and affects the bacterial surface oxidation-reduction state	Torgomyan	2011-11-17	ARM	Biochemical and Biophysical Research Communications	English	70600				600	1	RF Signal Generator	Amplitude Modulation	Bacteria	Escherichia coli (Strain K12) - wild type	Effect	0	1	0	0	0	0	0	0	1	0	0	0	0	0	0	1	0	0	0	Y	Y	0	0	Y	0	0	0	0	0	0	0	0
4152	Nutrition and in vivo rotational motion: A microwave study	Webb	1974-01-19	CAN	International Journal of Quantum Physics	English	71400	50000	90000		500000 - 1000000	12	RF Signal Generator	Not Stated	Hamster	BHK Kidney Cell	Effect	1	0	0	0	0	0	0	0	0	0	0	0	0	0	1	0	0	0	0	0	N	0	0	0	0	0	0	0	0	0	Y	0
3956	Effect of millimetre waves on phosphatidylcholine membrane models: a non-thermal mechanism of interaction	Beneduci	2014-08-14	ITA	Soft Matter	English	74000	53570	78830	0.0073 - 0.0249	30	26	RF Signal Generator	Not Stated	NA	1,2-Dimyristoyl-sn-glycero-3-phosphatidylcholine/2H2O multilamellar vesicles	Effect	1	0	0	0	0	0	0	0	0	0	0	0	0	0	1	1	0	0	0	0	0	0	0	Y	0	0	0	0	0	0	0	0
1884	Influence of low power cm-/mm-microwaves on cardiovascular function	Muller	2007-01-22	DEU	International Journal ofEnvironmental Health Research		77000				30	0.25	Microwave	Pulsed	Human	Whole Body	No Effect	0	0	0	1	0	0	0	0	0	0	0	0	0	0	1	1	0	0	0	0	0	0	0	0	0	0	0	0	0	0	0	0
3969	Temperature oscillations in liquid media caused by continuous (nonmodulated) millimeter wavelength electromagnetic irradiation	Khizhnyak	1996-01-01	RUS	Bioelectromagnetics	English	78200	53000	78200	10 - 80000	100-10,000,000	0.5 + 0.5	RF Signal Generator	Continuous	NA	Salt Water (NaCl)	Effect	1	0	0	0	0	0	0	0	0	1	0	0	0	0	0	0	0	0	0	0	0	0	0	0	0	0	0	0	0	0	0	0
1562	Lack of effect of 94 GHz radio frequency radiation exposure in an animal model of skin carcinogenesis	Mason	2001-10-01	USA	Carcinogenesis	English	94000				10000000	0.003	RF Signal Generator	Continuous	Mice	Back	No Effect	0	1	0	0	0	0	0	1	1	0	0	0	0	0	0	0	0	0	0	0	0	0	0	0	0	0	0	0	0	0	N	0
1946	Heating and pain sensation produced in human skin by millimeter waves: comparison to a simple thermal model	Walters	2000-03-01	USA	Health Physics	English	94000				9500000 - 16500000	0.000833333	Microwave Heating Device	Pulsed	Human	Back	Effect	0	0	0	1	0	0	0	1	0	0	0	0	0	0	1	0	0	0	0	0	0	0	0	0	0	0	0	0	0	0	0	0
2207	The effect of a 94 GHz electromagnetic field on neuronal microtubules	Samsonov	2012-10-18	USA	Bioelectromagnetics	English	94000				310000	0.00833333	Microwave Heating Device	Not Stated	Xenopus	Embryo Neuronal Cells	Effect	1	0	0	0	0	0	0	1	1	0	0	0	0	0	0	0	0	Y	0	0	0	0	0	0	0	0	0	0	0	0	0	0
2242	Millimeter Wave-induced Modulation of Calcium Dynamics in an Engineered Skin Co-culture Model: Role of Secreted ATP on Calcium Spiking	Sun	2012-03-01	USA	Journal of Radiation Research	English	94000				NS	1	mm Wave generator	Continuous	Mouse	Embryonal Carcinoma Cells (Cell Line)	Effect	1	0	0	0	0	0	0	1	1	0	0	0	0	0	0	1	0	0	0	0	0	0	Y	0	0	0	0	0	0	0	0	0
2253	Altered calcium dynamics mediates P19-derived neuron-like cell responses to millimeter-wave radiation	Titushkin	2009-12-01	USA	Radiation Research	English	94000				18600000	1	Microwave Heating Device	Continuous	Mouse	Embryonic Stem Cell-Derived Neuronal Cells	Effect	1	0	0	0	0	0	0	1	1	0	0	0	1	0	0	0	0	0	0	0	0	0	Y	0	0	0	0	0	0	0	0	0
3736	Evaluation of the Effect of Chronic 94 GHz Exposure on Gene Expression in the Skin of Hairless Rats In Vivo	Habauzit	2020-04-01	FRA	Radiation Research	English	94000				100000	192.86	RF Signal Generator	Not Stated	Rats	Whole Body	No Effect	0	1	0	0	0	0	0	1	1	0	0	0	0	0	0	1	0	0	N	0	0	0	T	0	0	0	0	0	0	0	0	0
2007	Effect of 99 GHz continuous millimeter wave electro-magnetic radiation on E. coli viability and metabolic activity	Cohen	2010-09-01	ISR	International Journal of Radiation Biology	English	99000				1700	1 - 19	RF Signal Generator	Continuous	Bacteria	Escherichia coli	Effect	0	1	0	0	0	0	0	0	0	0	0	0	0	0	1	1	0	0	0	T	N	0	T	0	0	0	0	0	0	0	0	0
2064	Effects of 100 GHz radiation on alkaline phosphatase activity and antigen-antibody interaction	Homenko	2008-12-02	ISR	Bioelectromagnetics	English	100000				80	1	RF Signal Generator	Continuous	Bovine	Alkaline Phosphatase (Enzyme)	Effect	1	0	0	0	0	0	0	0	1	0	0	0	1	0	0	1	0	0	0	0	0	Y	0	0	0	0	0	0	Y	0	0	0
2092	Terahertz radiation increases genomic instability in human lymphocytes	Korenstein-Ilan	2008-08-01	ISR	Radiation Research	English	100000			2.4	310	1	RF Signal Generator	Continuous	Human	Lymphocytes (blood)	Effect	1	0	0	0	0	0	0	0	1	0	0	0	0	0	0	1	Y	0	0	0	0	0	0	0	0	0	0	0	0	0	0	0
3720	Terahertz Radiation Induces Spindle Disturbances in Human-Hamster Hybrid Cells	Hintzsche	2011-03-09	DEU	Radiation Research	English	106000				430	0.5	RF Signal Generator	Continuous	Human/Hamster	Hybrid (A(L) ) cell line	Effect	1	0	0	0	0	0	0	0	1	0	1	0	0	0	0	1	P	0	0	0	0	0	0	0	0	0	0	0	0	0	0	0
355	Terahertz Electromagnetic Fields (0.106 THz) Do Not Induce Manifest Genomic Damage In Vitro	Hintzsche	2012-09-27	DEU	Plos One	English	106000				8800	2 - 24	RF Signal Generator	Continuous	Human	Skin HaCaT Keratinocyte Cell Line	No Effect	1	0	0	0	1	0	0	0	1	0	0	0	1	0	0	1	T	0	0	T	0	0	0	0	0	0	0	0	0	0	0	0
210	Cytogenetic observations in human peripheral blood leukocytes following in vitro exposure to THz radiation: a pilot study	Zeni	2007-04-01	ITA	Health Physics	English	120000			0.4	500	0.333333	RF Signal Generator	Pulsed	Human	Blood	No Effect	1	0	0	0	0	0	0	0	1	0	0	0	0	0	0	1	N	0	0	0	0	0	0	0	0	0	0	0	0	T	0	0
4037	Study of the effects of 0.15 terahertz radiation on genome integrity of adult fibroblasts	Franchini	2018-07-01	ITA	Environmental and Molecular Mutagenesis	English	120000	100000	150000	15-20	4000	0.333333	Compact Free Electron Laser (FEL)	Pulsed	Human	Dermal Fibroblasts	Effect	1	0	0	0	0	0	0	1	1	0	0	0	0	0	0	1	Y	Y	T	0	0	0	0	0	0	0	0	0	0	0	0	0
2193	Permeability changes induced by 130 GHz pulsed radiation on cationic liposomes loaded with carbonic anhydrase	Ramundo-Orlando	2007-07-09	ITA	Bioelectromagnetics	English	130000				50000 - 170000	0.0416667	Rf Signal Generator	Pulsed	N/A	Liposomes and Carbonic Anhydrase	Effect	1	0	0	0	0	1	0	0	1	0	0	0	0	0	0	1	0	0	0	0	0	0	0	Y	0	0	0	0	0	0	0	0
3933	Inhibition of Bacterial Cell Growth by 136 gc Microwaves	Webb	1968-04-27	CAN	Nature	English	136000					4	RF Signal Generator	Not Stated	Bacteria	Escherichia coli B	Effect	1	0	0	0	0	0	0	0	0	0	0	0	0	0	1	1	0	0	0	Y	N	0	0	0	0	0	0	0	0	0	0	0
1976	The effects of terahertz radiation on human keratinocyte primary cultures and neural cell cultures	Bourne	2008-12-01	GBR	ATLA	English	140000				620000	0.17	Microwave Heating Device	Pulsed	Human	Keratinocytes (NHK)/Corneal Cells	No Effect	1	0	0	0	0	1	0	0	0	0	0	1	0	0	0	0	0	0	N	0	0	T	N	0	0	0	0	0	0	0	0	0
1960	The non thermal effect of weak intensity millimeter waves on physicochemical properties of water and water solutions	Ayrapetyan	2009-12-17	ARM	Electromagnetic Biology and Medicine	English	160000			0.8	58000	0.166667	RF Signal Generator	Pulsed	N/A	Water/Physiological Solution	Effect	1	0	0	0	0	0	0	0	0	0	0	0	0	0	1	1	0	0	0	0	0	0	Y	0	0	0	0	0	0	0	0	0
1685	Effect of low-intensity extremely high frequency radiation on reproductive function in wistar rats	Subbotina	2006-08-01	RUS	Bulletin of Experimental Biology and Medicine	English	?	30000	300000		3000	17.5	RF Signal Generator	Continuous	Rats	Whole Body	Effect	0	1	0	0	0	0	0	0	0	0	0	0	0	0	1	1	0	Y	0	0	0	0	0	0	Y	0	0	0	0	0	0	0
1593	The Production of Tumor Necrosis Factor in Cells of Tumor-Bearing Mice after Total-Body Microwave Irradiation and Antioxidant Diet	Novoselova	2004-01-01	RUS	Electromagnetic Biology and Medicine	English		8150	18000	0.005	10	10.5	RF Signal Generator	Continuous	Mice	Whole Body	Effect	0	1	0	0	0	0	0	0	1	0	0	0	0	0	0	1	0	0	Y	0	0	0	Y	0	0	0	0	0	Th	Y	Th	0
1594	Effect of centimeter microwaves and the combined magnetic field on the tumor necrosis factor production in cells of mice with experimental tumors	Novoselova	2001-01-01	RUS	Biofizika	Russian/English Abstract		8150	18000		10	10.5	RF Signal Generator	Not Stated	Mice	Whole Body	Effect	0	1	0	0	0	0	0	0	0	0	0	0	0	0	1	1	0	0	Y	0	0	0	Y	0	0	0	0	0	Th	Y	0	0
1796	Human skin as arrays of helical antennas in the millimeter and submillimeter wave range	Feldman	2008-03-28	ISR	Physical Review Letters	English		75000	110000	NS	NS	0.5	RF Signal Generator	Not Stated	Human	Hand	Effect	0	0	0	1	0	0	0	0	1	0	1	0	0	0	0	U	0	0	0	0	0	0	0	0	0	0	0	0	0	0	0	0
1797	The electromagnetic response of human skin in the millimetre and submillimetre wave range	Feldman	2009-06-07	ISR	Physics in Medicine and Biology	English		75000	110000	NS	NS	0.5	RF Signal Generator	Not Stated	Human	Hand	Effect	0	0	0	1	0	0	0	0	1	0	1	0	0	0	0	U	0	0	0	0	0	0	0	0	0	0	0	0	0	0	0	0
1970	Microwave induced shift of the main phase transition in phosphatidylcholine membranes	Beneduci	2012-04-01	ITA	Bioelectrochemistry	English		53000	78000	0.012	NS	6.5	Microwave	Continuous	N/A	1,2-Dimyristoyl-sn-glycero-3-phosphatidylcholine/2H2O multilamellar vesicles	Effect	1	0	0	0	0	0	0	0	1	0	0	0	0	0	0	1	0	0	0	0	0	0	0	Y	0	0	0	0	0	0	0	0
2006	Selective inhibition of tumoral cells growth by low power millimeter waves	Chidichimo	2002-05-01	ITA	Anticancer Research	English		53570	78330		0.7	12	RF Signal Generator	Continuous	Human	Tumour cell Lines	Effect	1	0	0	0	0	0	0	0	1	0	1	0	0	0	0	1	0	Y	0	Th/T	0	0	0	Y	0	0	0	0	0	0	Th	0
2284	Millimeter wave treatment inhibits the mitochondrion-dependent apoptosis pathway in chondrocytes	Wu	2011-06-30	CHN	MOLECULAR MEDICINE REPORTS	English		30000	40000		40000	72	RF Signal Generator	Not Stated	Rats	Chondrocytes (cartilage)	Effect	1	0	0	0	0	0	0	0	0	1	0	0	0	0	0	1	0	0	0	0	Th	0	Y	Th	0	0	0	0	0	0	0	0
2285	Experimental study of millimeter wave-induced differentiation of bone marrow mesenchymal stem cells into chondrocytes	Wu	2009-04-01	CHN	International Journal of Molecular Medicine	English		30000	40000		40000	0.5 -1	RF Signal Generator	Not Stated	Rats	Bone Marrow Mesenchymal Stem Cells	Effect	1	0	0	0	0	0	0	0	1	0	0	0	0	0	0	1	0	Y	Y	Y	0	0	0	0	0	0	0	0	0	0	0	0
2711	Involvement of the p38 MAPK signaling cascade in stress response of RAW 264.7 macrophages	Novoselova	2017-09-01	RUS	Cell Biology	English		8500	18000		10	1	RF Signal Generator	Not Stated	Mice	Macrophages	Effect	1	0	0	0	0	0	0	0	1	0	0	0	0	0	0	1	0	0	Y	0	0	0	Y	0	0	0	0	0	Y	0	0	Y
3001	Chromosome DNA as a Target of Resonant Interaction Between Escherichia Coli Cells and Low–Intensity Millimeter Waves	Belyaev	1992-01-01	RUS	ELECTRO- AND MAGNETOBIOLOGY	English		51620	51840	0.006	10	0.166667	RF Signal Generator	Continuous	Bacteria	Escherichia coli	Effect	0	1	0	0	0	0	0	0	0	0	0	0	0	0	1	1	P	0	0	0	0	0	0	0	0	0	0	0	0	0	0	0
3111	Extremely low-level microwaves attenuate immune imbalance induced by inhalation exposure to low-level toluene in mice	Novoselova	2017-05-01	RUS	nternational Journal of Radiation Biology	English		8150	18000		10	1	RF Signal Generator	Not Stated	Mice	Whole Body	Effect	0	1	0	0	0	0	0	0	1	0	0	0	0	0	0	1	0	0	Y	0	0	0	Y	0	0	0	0	0	Y	0	0	Y
3499	Terahertz underdamped vibrational motion governs protein-ligand binding in solution	Turton	2014-06-03	GBR	Nature Communications	English		125	10000000		NS	?	Laser Oscillator	Pulsed	N/A	Protein Solution	Effect	1	0	0	0	0	0	0	0	0	0	0	0	0	0	0	U	0	0	0	0	0	Y	Y	0	0	0	0	0	0	0	0	0
3651	Microwaves and cellular immunity: II. Immunostimulating effects of microwaves and naturally occurring antioxidant nutrients	Novoselova	1999-10-01	RUS	Bioelectrochemistry and Bioenergetics	English		8150	18000		10	5-72	Microwave Generator	Continuous	Mice	Whole Body	Effect	0	1	0	0	0	0	0	0	1	0	0	0	0	0	0	1	0	0	Y	Y	0	0	Y	0	0	0	0	0	Y	0	0	0
3652	Stimulation of production of tumor necrosis factor by murine macrophages when exposed in vivo and in vitro to weak electromagnetic waves in the centimeter range	Novoselova	1998-11-01	RUS	Biofizika	Russian/English Abstract		8150	18000		10	NS	Microwave Generator	Continuous	Mice	Whole Body	Effect	0	1	0	0	0	0	0	0	0	0	0	0	0	0	1	1	0	0	Y	0	0	0	Y	0	0	0	0	0	Y	0	0	0
3907	Switching of prophage lambda-genes in Escherichia coli by millimetre waves	Lukashevsky	1990-01-01	RUS	Medical Science Research	English		70300	70600	0.8-4.0	4000	0.5	RF Signal Generator	Not Stated	Bacteria	Escherichia coli	Effect	0	1	0	0	0	0	0	0	1	0	0	0	0	0	0	1	P	0	Y	0	0	0	0	0	0	0	0	0	0	0	0	0
3143	Biological effects of in vitro THz radiation exposure in human foetal fibroblasts	De Amicis	2015-11-01	ITA	Mutation Research/Genetic Toxicology and Environmental Mutagenesis	English		100000	150000		4000	0.333333	ENEA Compact Free Electron Laser	Pulsed	Human	Primary Fibroblasts (HFFF2) - Foetal Foreskin Fibroblast	Effect	1	0	0	0	0	0	0	1	1	0	0	0	0	0	0	1	Y	T	T	0	0	0	T/N	0	0	0	0	0	0	0	0	N
3913	Effects of Millimeter-band Electromagnetic Radiation on the Functional Activity of Certain Genetic Elements of Bacterial Cells	Smolyanskaya	1974-01-01	RUS	Soviet Physics Uspekhi	English		42200	51700		100 - 10000	0.5 - 2.0	RF Signal Generator	Not Stated	Bacteria	Bacillus coli	Effect	0	1	0	0	0	0	0	0	0	0	0	0	0	0	1	1	0	0	Y	0	0	0	Y	0	0	0	0	0	0	0	0	0
959	Transmission electron microscopy study of the effects produced by wide-band low-power millimeter waves on MCF-7 human breast cancer cells in culture	Beneduci	2005-03-01	ITA	Anticancer Research	English		53570	78330		0.0007	1 - 21	RF Signal Generator	Not Stated	Human	MCF-7 Breast Carcinoma Cell Line	Effect	1	0	0	0	0	0	0	0	1	0	1	0	0	0	0	1	P	Y	0	Th	0	0	0	Y	0	0	0	0	0	0	0	0
598	Frequency and irradiation time-dependant antiproliferative effect of low-power millimeter waves on RPMI 7932 human melanoma cell line	Beneduci	2005-03-01	ITA	Anticancer Research	English		53570	78330		44-46mW	1 - 21	RF Signal Generator	Not Stated	Human	RPMI 7932 Melanoma Cell Line	Effect	1	0	0	0	0	0	0	0	1	0	1	0	0	0	0	1	0	Y	0	Th	0	0	0	0	0	0	0	0	0	0	0	0
3847	Effect of millimeter-wave irradiation on growth of Saccharomyces cerevisiae	Furia	1986-06-30	USA	IEEE	English		41650	41788		20mW - 80mW	4	RF Signal Generator	Continuous	Yeast	Saccharomyces Cerevisiae Cells	Uncertain Effect	0	1	0	0	0	1	0	1	1	0	0	0	0	0	0	1	0	0	0	T	0	0	0	0	0	0	0	0	0	0	0	0
3914	Extremely high frequency electromagnetic fields at low power density do not affect the division of exponential phase Saccharomyces cerevisiae cells	Gos	1998-12-06	CHE	Bioelectromagnetics	English		41682	41710	0.8 - 1.33	5-500	5.5	RF Signal Generator	Not Specified	Yeast	Saccharomyces Cerevisiae Cells (strain WDHY376)	Uncertain Effect	0	1	0	0	0	1	0	0	0	0	0	1	0	0	0	1	0	0	0	T	0	0	0	0	0	0	0	0	0	0	0	0
3915	Nonthermal Effects of Millimeter Microwaves on Yeast Growth	Grundler	1978-01-01	DEU	Zeitschrift für Naturforschung	English		41412	41898		1000-20000	10-12	RF Signal Generator	Not Stated	Yeast	Saccharomyces Cerevisiae (strain 211)	Effect	0	1	0	0	0	0	0	0	0	0	0	0	0	0	1	1	0	0	0	Y	0	0	0	0	0	0	0	0	0	0	0	0
3923	Sharp resonances in yeast growth prove nonthermal sensitivity to microwaves	Grundler	1983-07-01	DEU	Physical Review Letters	English		41697	41782		<100000	NS	RF Signal Generator	Not Stated	Yeast	Saccharomyces Cerevisiae (strain 211)	Effect	0	1	0	0	0	0	0	0	1	0	0	0	0	0	0	1	0	0	0	Y	0	0	0	0	0	0	0	0	0	0	0	0
3925	Effect of millimeter waves on UV-induced recombination and mutagenesis in yeast	Pakhomova	1997-08-01	USA	ioelectrochemistry and Bioenergetics	English		61020	61420		1300	0.5	RF Signal Generator	Not Stated	Yeast	Saccharomyces Cerevisiae (strain D7)	Effect	0	1	0	0	0	0	0	1	1	0	0	0	0	0	0	1	P	0	0	0	N	0	0	0	0	0	0	Y	0	0	0	0
3934	Absorption of microwaves by microorganisms	Webb	1969-06-21	CAN	Nature	English		65000	75000		?	?	RF Signal Generator	Not Stated	Bacteria	Escherichia coli B	Effect	1	0	0	0	0	0	0	0	0	0	0	0	0	0	1	1	0	0	Y	Y	N	0	Y	0	0	0	0	0	0	0	0	0
3935	Investigation of the non-thermal effects of exposing cells to 70-300 GHz irradiation using a widely tunable source	Yaekashiwa	2017-12-21	JPN	Journal of Radiation Research	English		70000	300000		0.7 - 2.3	3 - 94	RF Signal Generator	Not Stated	Human	Skin Fibroblast (NB1RBG) Cell Line	No Effect	1	0	0	0	0	0	1	0	1	0	0	0	0	0	0	1	0	0	0	N	T	0	T	0	0	0	0	0	0	0	0	0
3939	Millimeter wave absorption spectra of biological samples	Ghandi	1980-06-16	USA	Bioelectromagnetics	English		26500	90000	?	?	1e-05	RF Signal Generator	Mixed Pulsed/Continuous	Yeast	Candida Krusei	No Effect	0	1	0	0	0	1	0	P	1	0	0	0	0	0	0	1	0	0	0	0	0	0	Y	0	0	0	0	0	0	0	0	0
3940	Effects of millimeter-wave radiation on monolayer cell cultures. III. A search for frequency-specific athermal biological effects on protein synthesis	Bush	1981-01-01	USA	Bioelectromagnetics	English		38000	48000		0 - 3540000	0.25	RF Signal Generator	Not Stated	Hamster	Kidney BHK‐21/C13 Cell Line	No Effect	1	0	0	0	0	0	0	1	1	0	0	0	0	0	0	?	0	0	N	0	0	0	N	0	0	0	0	0	0	0	0	0
3949	Biological effects of X-band microwave radiation on the eye of the crayfish	Munemori	1984-05-01	JPN	Medical and Biological Engineering and Computing	English		9400	9600		0.1 - 1000000	0.02	RF Signal Generator	Continuous	Crayfish	Eye	Effect	1	0	0	0	0	0	0	0	1	0	0	0	0	0	0	1	0	0	0	0	0	0	0	0	0	0	0	0	0	0	0	0
3950	Frequency-Specific Effects of Millimeter-Wavelength Electromagnetic Radiation in Isolated Nerve	Pakhomov	1997-01-01	USA	Electro- and Magnetobiology	English		41140	41540		2500	0.63	RF Signal Generator	Continuous	Frog	Sciatic Nerve	Effect	1	0	0	0	0	0	0	1	1	0	0	0	0	0	0	1	0	0	0	0	0	0	0	0	0	0	0	0	0	0	0	0
3951	Search for frequency-specific effects of millimeter-wave radiation on isolated nerve function	Pakhomov	1996-12-05	USA	Bioelectromagnetics	English		40500	51800		2200-30000	0.17-1.0	RF Signal Generator	Continuous	Frog	Sciatic Nerve	Effect	1	0	0	0	0	0	0	1	1	0	0	0	0	0	0	1	0	0	0	0	0	0	0	0	0	0	0	0	0	0	0	0
3961	Cell bathing medium as a target for non thermal effect of millimeter waves	Deghoyan	2012-06-01	ARM	Electromagnetic Biology and Medicine	English		90000	160000	1.49		0.02-0.17	RF Signal Generator	Amplitude Modulation	Rat	Brain Tissue and Skin (Head)	Effect	1	1	0	0	0	0	0	0	1	0	0	0	0	0	0	1	0	0	0	0	0	0	0	P	0	0	0	0	0	0	0	0
3964	The influence of millimeter waves on the physical properties of large and giant unilamellar vesicles	Cosentino	2013-06-01	ITA	Journal of Biological Physics	English		52000	72000		35-100	4	RF Signal Generator	Not Stated	N/A	Lipid Vesicle	Effect	1	0	0	0	0	0	0	0	1	0	0	0	1	0	0	1	0	Y	0	0	0	0	0	Y	0	0	0	0	0	0	0	0
3975	Microwave absorption by normal and tumor cells	Webb	1971-10-01	CAN	Science	English		66000	76000		0.02 -0.103	NS	RF Signal Generator	Not Stated	Hamster	Kidney Cells (BHK Cell Line),and Normal Kidney Cells	Effect	1	0	0	0	0	0	0	0	0	0	0	0	0	0	1	1	0	0	0	0	0	0	Y	0	0	0	0	0	0	0	0	0
3970	Effects of millimeter-wave radiation on monolayer cell cultures. II. Scanning and transmission electron microscopy	Stensaas	1981-03-30	USA	Bioelectromagnetics	English		41800	74000		3200000-4500000	1	RF Signal Generator	Not Stated	Hamster	Kidney Cells (BHK-21K13 Cell Line)	Effect	1	0	0	0	0	0	0	1	1	0	0	0	0	0	0	0	0	Y	0	0	0	0	0	0	0	0	0	0	0	0	0	0
3943	Millimeter Wave Radiations Affect Membrane Hydration in Phosphatidylcholine Vesicles	Beneduci	2013-07-09	ITA	Materials	English		53570	78830	0.001-0.003	35 – 100	4	RF Signal Generator	Continuous	NA	1,2-Dimyristoyl-sn-glycero-3-phosphatidylcholine/2H2O multilamellar vesicles	Effect	1	0	0	0	0	0	0	0	0	0	0	0	0	0	1	1	0	0	0	0	0	0	0	Y	0	0	0	0	0	0	0	0
4047	THz Exposure of Whole Blood for the Study of Biological Effects on Human Lymphocytes	Scarfi	2003-06-01	ITA	Journal of Biological Physics	English		120000	140000			0.333333	Compact Free Electron Laser (FEL)	Pulsed	Human	Lymphocytes - Peripheral Blood	No Effect	1	0	0	0	0	0	0	0	1	0	0	0	0	0	0	U	T	T	0	0	0	0	0	0	0	0	0	0	0	0	0	0
4150	Resonant Growth-Rate Response of Yeast-Cells Irradiated by Weak Microwaves	Grundler	1977-09-19	DEU	Physics Letters	English		41412	41898		27000	NS	RF Signal Generator	Not Stated	Yeast	Saccharomyces cereuisiae)	Effect	0	1	0	0	0	0	0	0	0	0	0	0	0	0	1	1	0	0	0	Y	0	0	0	0	0	0	0	0	0	0	0	0
4151	Resonant-Like Dependence of Yeast Growth-Rate on Microwave-Frequencies	Grundler	1982-03-01	DEU	The British Journal of Cancer Supplement	English		41640	41835		6 - 34 mW	NS	RF Signal Generator	Not Stated	Yeast	Saccharomyces cereuisiae)	Effect	0	1	0	0	0	0	0	0	0	0	0	0	1	0	0	1	0	0	0	Y	0	0	0	0	0	0	0	0	0	0	0	0
4156	Resonances between 1011 and 1012 Hz in Active Bacterial-Cells as Seen by Laser Raman-Spectroscopy	Webb	1977-02-21	USA	Physics Letters	English		75000	136000		?	NS	RF Signal Generator	Not Stated	Bacteria	Escherichia coli	Effect	0	1	0	0	0	0	0	0	0	0	0	0	0	0	1	U	0	0	0	0	0	0	Y	0	0	0	0	0	0	0	0	0
4153	Genetic Continuity and Metabolic-Regulation as Seen by Effects of Various Microwave and Black Light Frequencies on These Phenomena	Webb	01/02/1975	CAN	Annals of the New York Academy of Sciences	English		59000	143000		100000-500000	NS	RF Signal Generator	Not Stated	Bacteria	Escherichia coli B	Effect	0	1	0	0	0	0	0	0	1	0	0	0	0	0	1	?	0	0	Y	Y	0	0	Y	0	0	0	0	0	0	0	0	0
4154	Factors Affecting the Induction of Lambda Prophages by Millimeter Microwaves	Webb	1979-07-12	DEU	Physics Letters	English		69100	71000		2500	0.5	RF Signal Generator	Not Stated	Bacteria	Escherichia coli K12	Effect	0	1	0	0	0	0	0	0	0	0	0	0	0	0	1	1	0	0	Y	0	0	0	Y	0	0	0	0	0	0	0	0	0
4155	Possible Viral Involvement in Human Mammary-Carcinoma - Microwave and Laser-Raman Study	Webb	1977-02-10	USA	International Journal of Quantum Chemistry	English		65000	95000		1000000	1.5	RF Signal Generator	Triangular	Hamster	BHK Kidney Cell	Effect	1	0	0	0	0	0	0	0	0	0	0	0	0	0	1	0	0	0	0	0	N	0	Y	0	0	0	0	0	0	0	Y	0
		Biological Effect		Total Y=Effect Significant	Total Y=Effect Significant AND non-thermal	Total N= No Effect	Total N= No Effect AND non-thermal
		Genotoxicity		21	16	6	4
		Morphological		33	22	5	4
		Gene Expression		34	23	8	5
		Proliferation		29	25	1	1
		Viability		14	9	9	7
		Metabolic/Enzyme		14	12	0	0
		Biochemical		68	52	7	4
		Membrane		31	29	1	1
		Fertiltiy		7	7	0	0
		Endocrine		2	2	0	0
		Developmental		2	2	0	0
		Synergistic/Combinative		10	8	0	0
		Immune Function		23	19	2	1
		Haemotological		12	11	1	0
		Tumour Growth		4	2	1	0
		Cell Signalling		5	5	2	2
		Apoptosis		5	4	2	2
		Electrophysiol		20	18	0	0
		Oxidative Stress		18	14	1	0
		Cardio/Vascular		4	0	1	0
		Hepatic		2	1	0	0
		Brain/Neuronal		20	19	1	1
		Occular		4	0	1	1
		Neurotransmitters		1	1	0	0
		Hypoalgesic		4	4	0	0
		Behaviour		8	7	0	0
		Memory		3	3	1	1
		Learning		3	3	0	0
[truncated: 15 more columns]

## Sheet: Effects vs No Effects graph
Biological Effect	No signficant effects	Significant effects
Cardio/Vascular	0	0
Occular	1	0
Hepatic	0	1
Neurotransmitters	0	1
Endocrine	0	2
Developmental	0	2
Tumour Growth	0	2
Hypoalgesic	0	3
Memory	1	3
Learning	0	3
Apoptosis	2	4
Cell Signalling	2	5
Behavioural	0	6
Fertility	0	7
Synergistic/Combinative	0	8
Cell viability	7	9
Haemotological	0	11
Metabolic/Enzyme	0	12
Oxidative stress	0	14
Genotoxicity	4	16
Electrophysiological	1	18
Brain/Neuronal	1	19
Immune function	1	19
Morphological	4	22
Gene expression	5	23
Cell proliferation	1	25
Cell membrane	1	29
Biochemical changes	4	51		Biochemical
	35	315
Total	350
	0.1	0.9

## Sheet: Epidem Papers
PaperID	Title	MainAuthors	Language	Date_Pub	C_Code	Journal	Freq_Cat	RF Freq	RFLow	RFHigh	Exposure::SignalGen	Exposure::WaveType	Cumulative Hrs	Effect	Type of Study	Exposure Assessment	Risk/P-Value	Study Size	Endpoints	Population	Funding	Epidemiology	GFund	PFund	PubFund	IndFund	InstFund	UNFund	UnkFund	Paper_URL	Comment
199	Pregnancy Outcomes After Paternal Radiofrequency Field Exposure Aboard Fast Patrol Boats	Baste	English	2012-04-01	NOR	Journal of Occupational and Environmental Medicine	VHF to SHF (30 MHz - 60 GHz) workers		2.1	9400	Radar/Comms RF	Not Stated		Uncertain Effect	Retrospective Cohort	Actual measurements and Job matrix	Paternal Mortality Acute RR 2.87 (1.25-6.59) Long RR 0.97 (0.69-1.37) Preclampsia Acute RR 6.07 (1.77–20.8) Long RR 0.94 0.68–1.31	28,337 servicemen	Pregnancy Outcomes (Perinatal Mortality, Preclampsia	Military Personnel Exposure	Ministery of Defence (Military)	1	1	0	0	0	0	0	0	http://www.ncbi.nlm.nih.gov/pubmed/22354128	Low pregnancy in the highest exposure group makes it difficult to establish whether a dose response relation ship wxists between exposures and pregnancy outcomes. Preclampsia was to be significantly higher in the highest acute exposure group RR 6.07 (1.77–20.8) while Perinatal Mortality RR was highest in the medium acute exposure group RR 2.87 (1.25–6.59). An increased RR was found of perinatal m…
200	Radiofrequency electromagnetic fields; male infertility and sex ratio of offspring	Baste	English	2008-05-01	NOR	European Journal of Epidemiology	ELF to SHF (3 Hz - 60 GHz) workers				Radar/Comms RF			Effect	Cross Sectional	Questionnaire/Self Reported	OR 1.91 (1.19 - 3.07) for the 30-39 year olds	10,497 men	Infetility, Male/Female birth ratio	Military Personnel Exposure	Norwegian Navy (Military)	1	1	0	0	0	0	0	0	http://link.springer.com/article/10.1007%2Fs10654-008-9236-4	Exposure to other RF equipment in the highest group were also showing an OR for Infertility. There was also an indication of a dose response with higher exposures showing higher % of infertility
202	Testicular cancer and electromagnetic fields (EMF) in the workplace: results of a population-based case-control study in Germany	Baumgardt	English	2002-12-01	DEU	Cancer Causes and Control	VHF to SHF (30 MHz - 60 GHz) workers				Various EMR sources including Radar			No Effect	Case Control	Questionnaire/Self Reported with Expert Assessment	OR 1.0 (0.60 - 1.75)	269 Cases/797 Controls Over all Radar 22 Cases/58 Controls	Testicular Cancer	Occupational Exposure to Radar	Government	1	1	0	0	0	0	0	0	http://www.ncbi.nlm.nih.gov/pubmed/12588085	Funded by Federal Ministry for Education and Research. Some of the occupations identified as potential exposed to radar have been missclassified. See comment in KK paper for this study. Population size for radar control/exposed was very small 58 controls and 22 exposed - low statistical power)
212	Biological effects and health risks of electromagnetic fields at levels classified by ICNIRP and admissible among occupationally exposed workers: a study of the Nofer Institute of Occupational Medicine, Lodz	Bortkiewicz	Polish/English Abstract	2003-05-01	POL	Medycyna pracy (Occupational Medicine)	VHF to SHF (30 MHz - 60 GHz) workers				Various EMR sources including mobile phone towers, broadcast anttennas			Effect	?	?	?	?	Circulatory system, blood pressure and neurovegetative regulation	Occupational Exposure	Unknown	1	0	0	0	0	0	0	1	http://www.ncbi.nlm.nih.gov/pubmed/14669585	Explicitily mentions ICNIRP
219	Non-Hodgkin's lymphomas and occupation in Sweden	Cano	English	2001-08-01	SWE	International Archives of Occupational and Environmental Health	UHF - SHF (300 MHz- 60 GHz) studies				Radio transmiters			Effect	Prospective Cohort	Census data and Job Role	Radio Operators RR 2.32 (0.75 - 7.19) _x001E_Ships Pilots (Potential Radar) RR 1.84 (0.59-5.72)	1,779,646 men and 1,101,669 Women	non-Hodgkin's lymphoma	Occupational Exposure		1	1	0	0	0	0	0	0	http://www.ncbi.nlm.nih.gov/pubmed/11563608	A relative risk of 1.20 and statistically significant results were found for Telecommunications traffic officers and telegraph and radio operators. The risk excess was confirmed in men with the same occupation in both Census. The risk is explained by EMF exposure in the author's opinion.
238	Parental occupational exposures to electromagnetic fields and radiation and the incidence of neuroblastoma in offspring	De Roos	English	2000-07-01	USA	Epidemiology	ELF to SHF (3 Hz - 60 GHz) Ecological				Radio transmiters			Effect	Case Control	Questionnaire/Self Reported with Expert Assessment	Radar OR 2.2 (0.6–8.3) RF Transmitters < 7W OR 2.1 (0.9–5.2) RF Transmitters > 7W OR 0.9 (0.3–2.4)	1,040 mothers (537 case mothers, 503 control mothers) and 707 fathers (405 case fathers, 302 control fathers) 538 Cases (Children) Radar 9 Cases and 3 Controls RF Transmitters 20 Cases and 7 Controls	Neuroblastoma	Perantal Exposures -> Offspring	Government (NIH) and Childrens Cancer Group	1	1	0	0	0	0	0	0	http://www.ncbi.nlm.nih.gov/pubmed/11505168
241	All-cause mortality among Belgian military radar operators: a 40- year controlled longitudinal study	Degrave	English	2005-02-01	BEL	European Journal of Epidemiology	UHF - SHF (300 MHz- 60 GHz) studies				Radar and Radio Communications			No Effect	Retrospective Cohort	Job Role	SMR 1.05 (95% CI: 0.95–1.16) Professionals SMR 0.80 (95% CI: 0.75–0.85) Conscripts	27,671 militaries in the radar group and 16,128 militaries in the control group	Mortality Difference	Military Personnel Exposure	Military Research	1	1	0	0	0	0	0	0	http://link.springer.com/article/10.1007%2Fs10654-005-7922-z	Care needs to be taken when interpriting this one. Confirm they are looking at whether there was a mortality difference between soldiers who worked in different time periods. Were the controls not exposed to RF fields? It is interesting to note there was significant reduction in mortaility of the conscript exposed (1 year of service) compared to their controls.
242	Causes of death among Belgian professional military radar operators: a 37-year retrospective cohort study	Degrave	English	2009-02-01	BEL	International Journal of Cancer	UHF - SHF (300 MHz- 60 GHz) studies				Radar			Effect	Retrospective Cohort	Job Role/Modelling	RR 1.04; (95% CI: 0.96–1.14) all causes of death RR 3.51 (1.19–10.33) Symptoms, ill defined conditions RR 2.71 (0.42–17.49) Eye, brain and nervous system RR 7.22 (1.09–47.91) Lymphatic and hematopoietic tissue RR 1.23 (1.03–1.47) Neoplasm	4,417service men in Radar units and 2,932 service men controls	Neoplasms, Hemolymphatic Cancers, Subjective Symptoms (ill defined conditions)	Military Personnel Exposure	Military Research	1	1	0	0	0	0	0	0	https://www.researchgate.net/publication/23499262_Causes_of_death_among_Belgian_professional_military_radar_operators_A_37-year_retrospective_cohort_study
247	A cross-sectional study on non-ionizing radiation to male fertility	Ding	Chinese/English Abstract	2004-01-01	CHN	Zhonghua Liu Xing Bing Xue Za Zhi	UHF - SHF (300 MHz- 60 GHz) studies				Radar	Not Stated		Effect	Cross Sectional	Questionnaire/Self Reported	P<0.01	?	Sperm Effects	Occupation Exposure to Radar	Unknown	1	0	0	0	0	0	0	1	http://www.ncbi.nlm.nih.gov/pubmed/15061945
271	Assessment of cytogenetic damage and oxidative stress in personnel occupationally exposed to the pulsed microwave radiation of marine radar equipment	Garaj-Vrhovac	English	2011-01-01	HRV	International Journal of Hygiene andEnvironmental Health	SHF (3 GHz - 60 GHz) studies		3000	9400	Radar	Pulsed	14600	Effect	Cohort Retrospective	Expert Measurements	Micronuclei and DNA Strand Breaks (P<0.05)	29 Exposed Subjects and 29 Controls	DNA Damage, ROS	Occupation Exposure to Radar		1	1	0	0	0	0	0	0	http://www.sciencedirect.com/science/article/pii/S1438463910001069
276	Cancer in Korean war navy technicians: mortality survey after 40 years	Groves	English	2002-05-01	USA	American Journal of Epidemiology	UHF - SHF (300 MHz- 60 GHz) studies				Radar	Not Stated		Uncertain Effect	Retrospective Cohort	Job Role	SMR AllCauses 0.69 (0.67 - 0.71) SMR All Cancers 0.73 (0.69 - 0.77) Leukemia RR 1.48 (1.01 - 2.17) Nonlymphocytic leukemia RR 1.82 (1.05, 3.14) Acute nonlymphocytic leukemia RR 1.87 (0.98 - 3.58) Aviation electronic technicians ALl Leukaemias RR 2.6 (1.53, 4.43) AML RR 3.85 (1.50, 9.84) Testicular cancer RR 1.3 (0.35, 4.89)	40,581 Navy veterans	Lung Cancer, Brain Cancer, Testicular Cancer, Non-lymphocytic leukemia	Military Personnel Exposure	Unknown	1	0	0	0	0	0	0	1	https://academic.oup.com/aje/article/155/9/810/58192/Cancer-in-Korean-War-Navy-Technicians-Mortality?searchresult=1	Would love to know who funded this. Note there could be cases of missclasification of exposure by job role, which can create an incorrect picture (underestimation of risk). Non exposed controls would have been proved a more clearer picture
362	Comparison of chromosome aberrations in peripheral blood lymphocytes from people occupationally exposed to ionizing and radiofrequency radiation	Lalic	English	2001-04-01	HRV	Acta Medica Okayama	UHF - SHF (300 MHz- 60 GHz) studies			8000	Radio Transmitter Mast	Not Stated	54228.6	Effect	Cohort Retrospective	Questionnaire/Self Reported and Job Role with exposure measurements	Chromosome Aberrations p<0.001	20 NIR Exposed, 25 IR Exposed (Control information taken from other papers)	Chromosomal Aberrations	Occupational Exposures	Unknown	1	0	0	0	0	0	0	1	http://www.lib.okayama-u.ac.jp/www/acta/pdf/55_2_117.pdf
373	Evaluation of radiation damage to the sperm DNA of radar operators	Liu	Chinese/English Abstract	2003-10-01	CHN	Zhonghua Nan Ke Xue	UHF - SHF (300 MHz- 60 GHz) studies				Radar	Not Stated		Effect	Cross Sectional	?	?	?	Sperm Effects	Occupation Exposure to Radar	Unknown	1	0	0	0	0	0	0	1	http://www.ncbi.nlm.nih.gov/pubmed/14628594
378	Cytogenetic investigation of subjects professionally exposed to radiofrequency radiation	Maes	English	2006-03-01	BEL	Mutagenesis	VHF to SHF (30 MHz - 60 GHz) workers		140	40000	Radio Transmitter Mast	Mixture Pulsed & Continous	839.5	No Effect	Cohort Retrospective	Questionnaire/Self Reported	Chromatid Breaks showed a trend Exposed %1.93 and %1.82 for the exposed field engineers compared to 1.16 for Controls	49 Exposed and 25 Controls	DNA Breaks, Sister Chromatid Exchange (SCE), Chromosome Aberrations (Chromosome Breaks, Chromatid Breaks)	Occupation Exposure to Radio Masts	Unknown	1	0	0	0	0	0	0	1	http://mutage.oxfordjournals.org/content/21/2/139.long	Controls were people who maybe exposed to RF from microwaves and cordless phones. One could also assume mobile phones too. Really a comparison of higher exposed to lower exposed. Results were pooled so it is not possible to see if it was contaminated.
379	Mutagenic Potential of Radio Frequency Electromagnetic Fields	Magdy	English	2002-04-01	EGY	Online Journal of Biological Sciences	VHF to SHF (30 MHz - 60 GHz) workers				Radio Frequency	Not Stated	35457.1	Effect	Cohort Retrospective	Questionnaire/Self Reported and Exposure Assessment	Chromosome Structural Aberrations Engineers 2.85%, Air Traffic controllers 2.42% and Controls 0.40% (P < 0.01)	50 Exposed and 10 Controls	Chromosomal Aberrations, SCE, Mitotic Activity, Cell Kinetics	Occupation Exposure to RF (airport)	Unknown	1	0	0	0	0	0	0	1	https://www.researchgate.net/publication/46030221_Mutagenic_Potential_of_Radio_Frequency_Electromagnetic_Fields
380	A higher risk of congenital anomalies in the offspring of personnel who served aboard a Norwegian missile torpedo boat	Mageroy	English	2006-02-01	NOR	Occupational Environmental Medicine	VHF to SHF (30 MHz - 60 GHz) workers				Radar			Effect	Cross Sectional	Questionnaire/Self Reported and Exposure Assessment of Ship	(PR = Prevalence Rate) Congenital Defects PR 4.0 (1.9 to 8.6) Still Born PR 4.1 (1.7 to 9.9)	2265 Respondents (1438 with Children, 3100 children whose birth year was provided)	Birth Defects, Still Born	Occupation Exposure to Radar		1	1	0	0	0	0	0	0	http://www.ncbi.nlm.nih.gov/pubmed/16421386
388	Paternal occupational exposure to radiofrequency electromagnetic fields and risk of adverse pregnancy outcome	Mjoen	English	2006-07-21	NOR	European Journal of Epidemiology	ELF to SHF (3 Hz - 60 GHz) workers				Radio Frequency			Uncertain Effect	Cohort Retrospective	Job Title and Expert Assessment	Highest Exposures CNS Defects ORa 1.05 (0.73 - 1.49) Other Defects ORa 2.40 (1.22 - 4.70) Other Syndromes ORa 1.17 (0.71 - 1.91) Preterm Delivery ORa 1.08 (1.03 - 1.15) Low Birth Weight Ora 1.03 (0.94 - 1.13) Still Birth Ora 1.09 (0.89 - 1.29)	376,837 Births Paternal Not Exposed 139,871 Births Paternal "Possibly Exposed" 24885 Births Parternal Occupationally "Probably Exposed"	Other Birth Defects, Premature Birth	Occupation Exposure to RF	Unknown	1	0	0	0	0	0	0	1	http://link.springer.com/article/10.1007%2Fs10654-006-9030-0	One of the Authors is from the miltary - Institute of Military Epidemiology, Norwegian Armed Forces. Authors state "The use of occupation as criterion for exposure introduced a large uncertainty due to the broad and inhomogeneous categories of occupations resulting in an unreasonably large number classified as probably exposed even though most of them are unexposed. This approach may lead to misc…
391	Is fertility reduced among men exposed to radiofrequency fields in the Norwegian Navy?	Mollerlokken	English	2008-07-01	NOR	Bioelectromagnetics	UHF - SHF (300 MHz- 60 GHz) studies				Radar/Transmitter Mast/Electronics	Not Stated		Effect	Cross Sectional	Questionnaire/Self Reported with Expert Assessment	Telecomm OR 1.72, (95% confidence interval 1.04–2.85) radar/sonar OR 2.28,(95% confidence interval 1.27–4.09)	1487 Men (compulsory military service) were used for the study. Unexposed Group 1138	Infertility, Allergies, Testicular Cancer, Cardiac Infarction and Skin Cancer	Occuptional Exposure to Radar		1	1	0	0	0	0	0	0	http://onlinelibrary.wiley.com/doi/10.1002/bem.20400/abstract;jsessionid=DC5FE00F3B739B4FE03848620CD52B60.f02t02
392	Radiofrequency exposure and mortality from cancer of the brain and lymphatic/hematopoietic systems	Morgan	English	2000-03-01	USA	Epidemiology	ELF to SHF (3 Hz - 60 GHz) workers				Radio Transmitters			No Effect	Cohort Retrospective	Job Title	Brain Tumour MR 0.53 [95% CI = 0.21–1.09) Leukaemia MR 0.54 (95% CI = 0.33–0.83)	195,775 workers	Brain Cancers, Leukaemia, Mortality	Occupational Exposure	Motorola/Exponent	1	0	0	0	1	0	0	0	http://journals.lww.com/epidem/pages/articleviewer.aspx?year=2000&issue=03000&article=00007&type=abstract	Funded by Motorola and performed on Motorola Staff and the cohort comprised all U.S. Motorola employees with at least 6 months of cumulative employment who were employed for at least 1 day between January 1, 1976 and December 31, 1996.
407	Occupational safety: effects of workplace radiofrequencies on hearing function	Oktay	English	2004-11-01	TUR	Archives of Medical Research	ELF to SHF (3 Hz - 60 GHz) workers				Radio Broadcast Masts			Effect	Cohort Retrospective	Expert Measurements	Brainstem Evoked Response Audiometer Effects P >0.05 Pure Tone Audiometry Increased Threshold (exposed) P <0.05) - RF promotes sensorineural hearing loss	28 Occupational Exposed and 28 Matched Controls	Audiological Effects - Hearing Loss	Occupational and Public Exposure	Unknown	1	0	0	0	0	0	0	1	http://www.ncbi.nlm.nih.gov/pubmed/15631877
415	Review of Extensive Workups of 34 Patients Overexposed to Radiofrequency Radiation	Reeves	English	2000-03-01	USA	Aviation, Space, and Environmental Medicine	ELF to SHF (3 Hz - 60 GHz) workers				Radio Frequency			Uncertain Effect	Case Series	TBD	TBD	34 Patients (Over exposed)	Warmth, Nuerological	Military Personnel (Over) Exposure	US Airforce	1	1	0	0	0	0	0	0	https://www.ncbi.nlm.nih.gov/labs/articles/10716164/
453	The possible role of radiofrequency radiation in the development of uveal melanoma	Stang	English	2001-01-01	DEU	Epidemiology	ELF to SHF (3 Hz - 60 GHz) Ecological				Radio Frequency	Not Stated		Uncertain Effect	Case Control	Questionnaire/Self Reported with Expert Assessment	Radiotransmiters OR = 3.0 (95% CI = 1.4–6.3) Mobile Phone usage OR = 4.2 (95% CI = 1.2–14.5) Radar OR = 0.8 (95% CI = 0.0 – 6.5)	118 Cases and 475 Controls	Uveal Melanoma (Radar exposure), Uveal Melanoma (Radiosets), Uveal Melanoma (Mobile Phones)	Public/Occupational Exposure		1	1	0	0	0	0	0	0	https://www.emf-portal.org/en/article/5146
465	Epidemiological risk assessment of pathology development in occupational exposure to radiofrequency electromagnetic fields	Tikhonova	Russian/English Abstract	2003-09-01	RUS	Radiation biology. Radioecology	ELF to SHF (3 Hz - 60 GHz) workers				Radar			Effect	Cross Sectional	Period Health Examinations - Job Roles	Cardiovascular disease OR 3.78 (95% CI, 1.96 -7.27) Group 1 OR 2.13 (95% CI 1.13-4.03) in Group 2 Arterial Hypertension OR = 1.96 (95% CI 1.04-3.70) in Group 1 OR = 1.80 (95% CI 0.93-3.50) in Group 2 Ischemic Heart Disease OR = 7.9 (95% CI 3.48-18.06) in Group 1 OR = 3.0 (95% CI 1.23-7.33) in Group 2	250 Workers (3 groups - EHF (Group 1), HF (Group 2) and Control)	Cardiovascular Diseases	Occupational Exposure to Radar	Unknown	1	0	0	0	0	0	0	1	http://www.ncbi.nlm.nih.gov/pubmed/14658291
471	The effect of low level radiofrequency electromagnetic radiation on the excretion rates of stress hormones in operators during 24-hour shifts	Vangelova	English	2002-06-01	BGR	Central European journal of public health	UHF - SHF (300 MHz- 60 GHz) studies	300	410	9375	Radio Frequency		25028.6	Effect	Cross Sectional	Expert Measurements	11-oxycorticosteroid increased (p = 0.035) Increased variability in the secretion of Adrenalin and Noradrenalin (p = 0.001 and p =0.002 respectively)	12 Satellite station and TV Communications 12 Controls	Stress Hormones (catecholamines), Circadian Rhythm Changes	Occupational Exposures	Unknown	1	0	0	0	0	0	0	1	http://www.ncbi.nlm.nih.gov/pubmed/12096679	Exposures to RF leads to Hypertension and disorders of the vegetative regulation of cardiovascular function.
472	Variations of melatonin and stress hormones under extended shifts and radiofrequency electromagnetic radiation	Vangelova	English	2005-04-01	BGR	Reviews on Environmental Health	ELF to SHF (3 Hz - 60 GHz) workers		410	9375	Radio Frequency			Effect	Cross Sectional	Expert Measurements	Increased Cortisol Excretion (p <0.001) Increased Adranlin Excretion (p=0.028) Increased Noradrenalin Excetion (p<0.0000) Melatonin Excretion (P >0.05)	12 Broadcast Operators, 12 TV Staion Operators and 12 Satellite Operators (36 People)	Cortisol, Adrenalin, Noradrenaline, Melatonin	Occupational Exposures	Unknown	1	0	0	0	0	0	0	1	https://www.emf-portal.org/en/article/12395
484	Radar radiation damages sperm quality	Ye	Chinese/English Abstract	2007-09-01	CHN	Zhonghua Nan Ke Xue	UHF - SHF (300 MHz- 60 GHz) studies				Radar	Not Stated	0	Effect	Cross Sectional	TBD	Lower Sperm Concentration (p <0.01) Lower Sperm Motility (p <0.01) Reduced Grade A Sperm (p <0.01) Higher Abnormal Sperm (p <0.01)	348 Infertile Seamen split into 4 Groups Group 1 (128) exposed to Radar for 1-3 years Group 2 (58) Exposed to Radar for 3-6 years Group 3 (47) Exposed to Radar from 6 to 10 Years Group 4 (19) Exposed to Radar for more than 10 years Group 5 (96)Exposed to Radar for more than 4 years but free from exposure for 6 months Control Group (35) non marines and no exposure	Sperm Effects	Occupational Exposure to Radar	Unknown	1	0	0	0	0	0	0	1
540	Occupational EMF exposure from radar at X and Ku frequency band and plasma catecholamine levels	Singh	English	2015-09-01	IND	Bioelectromagnetics	UHF - SHF (300 MHz- 60 GHz) studies		8000	12000	(X-band, 8-12 GHz Radar		0	Effect	Case Control?	Job Role and Expert Measurements	Reduced Adrenalin in Group 2 P <0.05 There were some large variations for Dopamine and Noradrenalin between exposed and controls but did not reach significance.	166 Male Personal (Military) Contol Group = 68 X Band Radar = 40 Ku Band Radar = 58	Catecholamine Concentrations, Stress	Occupational Exposure to Radar	Unknown	1	0	0	0	0	0	0	1	http://onlinelibrary.wiley.com/doi/10.1002/bem.21925/abstract;jsessionid=1D02FAE935C71A4A64E420E0BBCF6A69.f04t03
995	Psychological symptoms and intermittent hypertension following acute microwave exposure	Forman	English	1982-11-01	USA	Journal of Occupational Medicine	VHF to SHF (30 MHz - 60 GHz) workers		8000	12000	(X-band, 8-12 GHz Radar	Not Stated	0	Effect	Case Series	TBD	TBD	2 Cases	Emotional Lability, Irritability, Headaches, and Insomnia and Hypertension	Occupational Exposure to Radar	Unknown	1	0	0	0	0	0	0	1	http://www.ncbi.nlm.nih.gov/pubmed/17929556
1014	A chromosomal study of workers with long-term exposure to radio-frequency radiation	Garson	English	1992-09-02	AUS	The Medical Journal of Australia	ELF to SHF (3 Hz - 60 GHz) workers		30	20000	Radio Frequency	Mixture Pulsed & Continous	?	No Effect	Cross Sectional	Questionnaire and Expert Measurements	Chromosome Gaps RR 1.5 (06-3.5) Chromosome Breaks RR 1.4 (0.8-2.3) Chromatid Breaks RR 1.2(0.7-2.1) Sum of Aberrations (1.2 (0.9-1.6)) Total Aberrant Cells RR 1.0 (0.8-1.3)	38 Linesmen and 40 Controls	Chromosome Aberrations (see comment)	Occupational Exposure to RF	Government	1	1	0	0	1	0	0	0	https://onlinelibrary.wiley.com/doi/abs/10.5694/j.1326-5377.1991.tb142282.x	There were some Chromosome Aberrations that were significant but they were balanced out at the end when TOTAL aberrations were considered. The controls appear to have an inordinate amount of aberrations - They are suggested to be in the historical range but one wonders whether to controls from "Telstra" were exposed to RF fields as well.
2354	Alterations of Visual Reaction Time and Short Term Memory in Military Radar Personnel	Mortazavi	English	2013-04-01	IRN	Iranian Journal of Public Health	UHF to Radar (300 MHz to 300 GHz)				Radar			Effect	Retrospective Cohort	Questionnaire/Self Reported	Improved Reaction times 238.58 +/- 23.47 milliseconds (exposed) vs 291.86 +/- 28.26 milliseconds (Controls) Impaired Short Term Memory Forward digit span Exposed 3.56 ± 0.77 Controls 4.29 ± 1.06 Backward digit span Exposed 2.70 ± 0.69 Control 3.62 ± 0.95 Word Rec-ognition Exposed 3.37 ± 1.13 Control 5.86 ± 1.11 Paired words Exposed 13.56 ± 1.78 Control 15.21 ± 2.20	100 Radar Workers 57 Controls	Reduced Reaction Time, Impaired Memory	Occupational Exposure to Radar		1	0	0	0	0	1	0	0	https://www.ncbi.nlm.nih.gov/pubmed/23785684
2728	Effect of occupational EMF exposure from radar at two different frequency bands on plasma melatonin and serotonin levels	Singh	English	2015-05-01	IND	International Journal of Radiation Biology	SHF (3 GHz - 60 GHz) studies	9500	8000	12000	Radio Frequency		17311.4	Effect	Retrospective Cohort	Questionnaire and Expert Measurements	Group 1 saw changes compared to Group 2 and Control but never reached significant P>0.05 Group 2 saw reduced Melatonin P<0.05, Increased Serotonin P <0.05	68 Controls 40 Exposed to 8-12 GHz 58 Exposed to 12.5-18GHz	Melatonin and Serotonin Levels	Occupational Exposure to Radar		1	1	0	0	0	0	0	0	http://www.tandfonline.com/doi/abs/10.3109/09553002.2015.1004466?journalCode=irab20
3010	Radio frequency radiation-related cancer: assessing causation in the occupational/military setting	Peleg	English	2018-05-01	ISR	Environmental Research	VHF to SHF (30 MHz - 60 GHz) workers		20	30000	Radio Frequency		0	Effect	Case vs Case (removes some biases presented by Case Control)	Questionnaire and Expert Assessment	HL Cancer P <0.001	23 RFR only patients, 44 Mixed RFR and ELF	Hematolymphatic Cancers	Occupational and Military Exposure		1	0	0	1	0	1	0	0	https://www.sciencedirect.com/science/article/pii/S0013935118300045?via%3Dihub	High HL cancer risk in four independent groups of people in three different countries exposed to RFR in the military/occupational settings. Reference to IARC. Important Paper. Authors Abstract state "The PF of HL cancers in the case series was very high, at 40% with only 23% expected for the series age and gender profile, confidence interval CI95%: 26–56%, p<0.01, 19 out of 47 patients had HL can…
3529	Cluster of testicular cancer in police officers exposed to hand-held radar	Davis	English	1993-08-01	USA	American Journal of Industrial Medicine	VHF to SHF (30 MHz - 60 GHz) workers				Radar (Hand Held)	Not Stated	0	Effect	Retrospective Cohort	Job Role	O/E 6.9; P<0.001	340 Police Offices	Testicular Cancer	Occupational Exposure	Unknown	1	0	0	0	0	0	0	1	https://onlinelibrary.wiley.com/doi/abs/10.1002/ajim.4700240209
3697	Cancer morbidity in subjects occupationally exposed to high frequency (radiofrequency and microwave) electromagnetic radiation	Szmigielski	English	1996-02-02	POL	The Science of the Total Environment	UHF - SHF (300 MHz- 60 GHz) studies				Radio Frequency	Pulsed	0	Effect	Case Control	Job Role and Expert Measurements	Incidence of Neoplasms P < 0.05 Haematolytic Cancer Ratio 6.31 (CI 95%, 3.12 - 14.32 Colorectal Ratio 3.19 (CI 95%, 1.54 - 6.19) Nervous System and Brain Ratio 1.91 (CI 95%, 1.08 - 3.47) Thyroid Ratio 1.54 (CI 95%, 0.82 - 2.59) Skin Cancer Ratio 1.67 (CI 95%, 0.92 - 4.13)	Annual military population was investigated with a annual mean of 127,800 people and the number of cases (mean) was 3720 annually.	Brain Tumours, Hematolymphatic Cancers, Alimentary Tract (GI), Colorectal Cancer, Thyroid, Skin Cancer	Military Personnel Exposure	EU - Government	1	1	0	0	0	0	0	0	https://www.sciencedirect.com/science/article/pii/0048969795049150?via%3Dihub	Authors state "cancer morbidity rates are high enough to prove that the incidence of all malignancies is doubled P < 0.05) in RF/MW-exposed personnel, compared to their unexposed colleagues of the same socio-economic status and living under similar environmental and working conditions "
3842	Exposure to radiofrequency radiation increases the risk of breast cancer: A systematic review and meta-analysis	Shih	English	2020-11-09	ROC		ELF to SHF (3 Hz - 60 GHz) Ecological				Radio Frequency				Systematic Review	Not relevant			Breast Cancer (Occupational), Breast Cancer (Domestic RF usages)	Public/Occupational Exposure		1	1	0	0	0	0	0	0	https://www.ncbi.nlm.nih.gov/pmc/articles/PMC7690245/	Retracted
152	Adverse health effects of occupational exposure to radiofrequency radiation in airport surveillance radar operators	Dehghan	English	2013-01-01	IRN	Indian Journal of Occupational & Environmental Medicine			14000	18000	Radar	Pulsed	2-10+ Years						Sunjective Symptoms, Headache, Sleep, Memory, Cognitive Effects, Depression	Occupational Exposure (Airport)	Unknown	1	0	0	0	0	0	0	1	https://www.ncbi.nlm.nih.gov/pmc/articles/PMC3777288/	Note - retracted due to pressure from Government and not because of any fundamental issue in the paper
2461	Effects upon health of occupational exposure to microwave radiation (radar)	Robinette	English	1980-07-01	USA	American Journal of Epidemiology	UHF - SHF (300 MHz- 60 GHz) studies	NS	NS	NS	Radar	NS		Uncertain Effect	Retrospective Cohort	Job Role	ET = Electronics Technican, FC = Fire Control, AT = Aircraft Technician MR All Diseases 0.96 for high Exposure Group (pooled) 0.83 for ET, 1.19 for FC/AT MR Malignant Neoplasms 1.04 for all high exposure group (pooled) 0.95 for ET, 1.18 for FC/AT MR for Digestive Organs Neoplasms 1.14 for all high exposure group (pooled) 1.10 for ET, 1.19 for FC/AT MR Lymphatic and hematopoietic system 1.18 for a…	20781 Low Exposure Group 20109 High Exposure Group	All Malignant Neoplams, Musculoskeletal, Nervous System, Endocrine, Neurological, Dermatological, Cardiovascular, Digestive System (Malignancies), Lymphatic and hematopoietic malignancies, Genital - Urinary Effects	Military Personnel	US Dept Defence	1	1	0	0	0	0	0	0	https://pubmed.ncbi.nlm.nih.gov/7395854/	Military Funded, A lot of assumptions, classification of high exposure has no separation of Aviation and Fire Control. Electronics Technician exposure maybe questionable as a high exposure group thereby creating a potential underestimation of moretality when pooling results risk, Some tables presented number of cases but not ratio (for cause of disease)
3029	First epidemiological study on occupational radar exposure in the French Navy: a 26-year cohort study	Dabouis	English	2016	FRA	International Journal of Environmental Health Research	SHF (3 GHz - 60 GHz) studies				Radar			Uncertain Effect	Retrospective Cohort	RF Measurements	Neoplasms RR 0.92 (0.69–1.24) Respiratory Disease RR 0.17* (0.03–0.92) Nervous System RR 2.70 (0.34–21.52) Digestive System RR 1.18 (0.39–3.56) Blood Cancers RR 1.64 (0.37–7.34)	39850 (control group n = 18,310 and radar group n = 21,540 Mortality 885 Radar and 299 Control	Neoplasms, Endocrine, Mental Disorders, Nervous System. Circulatory, Respiratory, Digestive, Other illnesses, Blood Cancers, Mouth Cancers, Digestive Organ Cancers, Respiratory Cancers, Bone Cancers, Eye and Brain Cancers,	Military Personnel	French Milatary	1	1	0	0	0	0	0	0	https://pubmed.ncbi.nlm.nih.gov/26216082/	Military Funded - Exposure was considered to be from 6 months to 8 years - significant difference and not exactly long term. Also only looking at those who died (cause of death) and not those who are currently living. Control matching may have been a problem. Radar exposure suggested to reduce respiratory diseases which is opposite to other studies. Cancer numbers are too small in some cases and …
2452	Occupation and risk for testicular cancer: a case-control study	Hayes	English	1990	USA	International Journal of Epidemiology	UHF - SHF (300 MHz- 60 GHz) studies				Radar/Radio Waves			Uncertain Effect	Case Control	Job Role and Questionaire/Self Reported	Radar Equipment OR 1.3 (0.6-2.8) Seminoma and 1.1 (0.6 - 1.9) other Germinal cell Carcinoma Microwaves/Radio OR 2.8 (0.9 - 8.6) Seminoma and 3.2 (1.4-7.4) for other types of Germinal cell carcinoma	Cases 266 Cases and 259 Controls	Testicular Cancer (Radar), Testicular Cancer (Radio Waves)	Occupational	Not Declared/US Military researchers	1	0	0	0	0	0	0	1	https://pubmed.ncbi.nlm.nih.gov/1964675/	No association stated based on Job Title - yet when looking at RF exposures in general and testicular cancer was significant. Auhors down played finding - some of whom work for US Navy and Army
3633	Case-control study on risk factors for testicular cancer	Hardell	English	1998	SWE	INTERNATIONAL JOURNAL OF ONCOLOGY	UHF - SHF (300 MHz- 60 GHz) studies				Radar/Radio Waves			Uncertain Effect	Case Control	Job Role and Questionaire/Self Reported	Electronics/telecomm OR 2.3 (0.8 - 6.7) Amateur Radio Oper. OR 2.2 (07 - 6.6) Radar Worker OR 2.0 (0.3 - 14.2)	148 Cases and 314 Controls	Testicular Cancer (Radar), Testicular Cancer (Radio Waves)	Occupational	Government/Institution	1	1	0	0	0	1	0	0	https://pubmed.ncbi.nlm.nih.gov/9824648/	OR of 2.0 but there was not many people in the pool who were occupationally involved in radar so the statistical power is very small. There was also an OR of 2.3 for Telecommunications workers.
3911	Environmental, occupational and familial risks for testicular cancer: a hospital-based case-control study	Walschaerts	English	2007	FRA	International journal of andrology	EMF and Other Agents				Radar/Welders			No Effect	Case Control	Job Role and Questionaire/Self Reported	Radar OR 0.84 (0.38–1.87) Welding OR 2.84 (1.51–5.35)	229 Cases and 800 Controls	Testicular Cancer (Welder), Testicular Cancer (Radio Waves)	Occupational	Government/Industry	1								https://pubmed.ncbi.nlm.nih.gov/17708752/	Funded by Agricultural and Petrochemical industry. Questionaire based study, no details on exposure levels or duration. Univariate - Welding significant Association, Multi variate - Not statistically significant.
3042	Radiation exposure, socioeconomic status, and brain tumor risk in the US Air Force: a nested case-control study	Grayson	English	1996	USA	American Journal of Epidemiology	ELF to SHF (3 Hz - 60 GHz) workers				Radar/Radio Waves			Effect	Case Control (nested)	Job Matrix, Rank and Expert Assessment	Brain Tumour (BT) OR 1.39 (95% Cl 1.01-1.90) Officers BT 2.11 (95% Cl 1.48-3.01), Senior Officers BT OR 3.30 (95% Cl 1.99-5.45)	230 Cases and 920 Controls	Brain Tumours	Military Personnel	Government/US Airforce	1	1	0	0	0	0	0	0	https://pubmed.ncbi.nlm.nih.gov/8610663/	It was interesting to note this statement - Potential controls were not eligible if they had been diagnosed with leukemia, breast cancer, or malignant melanoma, because excess risks for these tumors have been associated with EMF exposures in other studies and was referencing - referenced Electromagnetic Fields and the Risk of Cancer: Report of an Advisory Group on Non-ionising Radiation. Setting …
2267	Brain neoplasms among naval military men	Santana	English	1999	BRA	International Journal of Occupational and Environmental Health	EMF and Other Agents				Radar/Electronics			Uncertain Effect	Case Control	Job Roles	Infantry Service Men OR = 2.30 (95% CI: 0.89, 5.99) Communications/Electronic staff OR = 0.56 (0.17 1.82) Health Workers OR = 2.93 (1.07 8.07)	40 Cases and 671 Controls	Brain Tumours (Communications Workers), Brain Tumours (Health Workers), Brain Tumours (Infantry)	Military Personnel	Government	1	1	0	0	0	0	0	0	https://pubmed.ncbi.nlm.nih.gov/10330507/	No association for Electronics/Communications occupational exposures - but cases were very low. Other groups where a borderline association was shown, some of whom would have been exposed to RF. Lots of potential confounders relating to chemical exposures and diesel fumes. Health Workers and Infantry Men had higher instances. brain tumors represent the fifth most common cancer among men in the Br…
3716	Intraocular melanoma linked to occupations and chemical exposures	Holly	English	1996	USA	Epidemiology	EMF and Other Agents				Welding/RF Exposures/Other			Effect	Case Control	Job Role and Questionaire/Self Reported	Microwave Radar OR 2.1 (1.1 - 4.0)	221 cases and 447 Controls	Uveal Melanoma	Occupational	Government	1	1	0	0	0	0	0	0	https://pubmed.ncbi.nlm.nih.gov/8664402/	Welders are exposed to various NIR EMF including ELF and IR/UV. Sailors are also exposed to Radar and Radio Communications RF but also Sunlight (UV)
1787	Occupation and the risk of bladder cancer	La Vecchia	English	1990	ITA	International Journal of Epidemiology	UHF to Radar (300 MHz to 300 GHz)				Radar/Other			No Effect	Case Control	Job Role and Questionaire/Self Reported	No risk associated with Radar exposure stated, no risk estimate provided	263 Cases and 287 Controls	Bladder Cancer	Occupational	Government/Public	1	1	0	1	0	0	0	0	https://pubmed.ncbi.nlm.nih.gov/2376434/	Not a useful study given details of radar exposures were not documented, number of cases not explicitly stated and no OR/RR provided. Just a comment of no association was made. No details for length of exposures.
3910	Cancer incidence among Ontario police officers	Finkelstein	English	2011	USA	AMERICAN JOURNAL OF INDUSTRIAL MEDICINE	UHF to Radar (300 MHz to 300 GHz)				Radar			Uncertain Effect	Retrospective Cohort	None	Prostate SIR 1.16 (0.93–1.43) Testes SIR 1.3 (0.89–1.84) (1.45 (0.96–2.1) for the longer serving members) Melanoma SIR 1.45 (1.10–1.88)	22,197 offıcers	Skin Cancer, Prostate Cancer, Testicular Cancer, Brain Cancer, Kideny Cancer, Bladder Cancer, Thyroid Cancer, Bone Cancer, Lung Cancer, Leukemia, Non Hodgkin's Lympoma, Larynx Cancer, Bone Tumour	Police - Occupational	Unknown	1	0	0	0	0	0	0	1	https://www.researchgate.net/publication/230695658_Cancer_Incidence_Among_Police_Officers_in_a_US_Northeast_Region_1976-2006	Testicular and Prostate Cancer showed a weak trend. Skin cancer could be linked to Sun exposures rather than radar. Exposure levels were not measured. Radar emissions from a radar will be away from the radar in the direction it is pointing.
262	Environmental risk factors for non-Hodgkin's lymphoma: a population-based case-control study in Languedoc-Roussillon, France	Fabbro-Peray	English	2001	FRA	Cancer Causes & Control	ELF to SHF (3 Hz - 60 GHz) Ecological				Radio/Welder/Other			Effect	Case Control	Job Title	ORa 1.3 (0.5 , 3.3) Radar Operator ORa 3.3 (1.5, 7.1) Radio Operator ORa 2.6 (1.4 -5.1) Welder	445 Cases 1025 Controls (Total Study) 437 Cases and 1010 Controls (Radar) 428 Cases and 1011 Controls (Radio) 23 Cases and 21 Controls (Daily Welding)	Non-Hodgkin's Lymphoma (Radar Operator) Non-Hodgkin's Lymphoma (Radio Operator)	Occupational	Government/Public/Institution	1	1	0	1	0	1	0	0	https://pubmed.ncbi.nlm.nih.gov/11405325/	It was mentioned that altered immune system functions may be the cause.
3300	Effect of Occupational Exposure to Radar Radiation on Cancer Risk: A Systematic Review and Meta-Analysis	Variani	English	2019	IRN	Asia Pacific Journal of Cancer Prevention	SHF (3 GHz - 60 GHz) studies				Radar			No Effect	Systematic Review				Cancer, Cancer Mortaility	Meta Analysis	Unknown	1	0	0	0	0	0	0	1	https://pubmed.ncbi.nlm.nih.gov/31759343/	Hardly a definitive review when only 6 studies were investigated. There are many papers looking at radar exposures and cancers. The problem with systematic reviews is the selection/exclusion criteria can be adjusted to give a finding that you are looking for. Need to check out each study individually. Biases need to be looked at to.
2848	Semen analysis of military personnel associated with military duty assignments	Weyandt	English	1996	USA	Reproductive Toxicology	SHF (3 GHz - 60 GHz) studies - Not an EMF exclusive study				Radar			Effect	(Cross Sectional) Observational	Questionnaire	The microwave exposed soldiers showed a significant decline in sperm count (P = 0.0085) and total sperm count (P = 0.027) and a difference approaching statistical significance in percent motile sperm (P = 0.059) and linearity (P = 0.064).	20 Radar Operators 30 Artillerymen 31 Controls	Reduced Sperm Count, Defective Sperm	Military Personnel	Government/Military	1	1	0	0	0	0	0	0	https://www.sciencedirect.com/science/article/pii/S0890623896001396	Study had a small sample size for both exposed and controls. One could also argue that the control pool, made up of soldiers may still have exposures to RF from wireless radio transmitters, therefore an understimation of the effects is possible. Details of Radar frequency and power density not povided
3912	Semen analysis of personnel operating military radar equipment	Hjollund	English	1997	DNM	Reproductive Toxicology	UHF to Radar (300 MHz to 300 GHz)				Radar			Effect	(Cross Sectional) Observational	Questionnaire and Measurements	No P values provided for most paremeters which are clearly and significantly different. Sperm density difference was mentioned at p=0.07 (borderline)	19 Exposed and 489 Controls	Reduced Semen Volume, Immotile Sperm, Sperm Morphology, Sperm Density	Military Personnel	Unknown	1	0	0	0	0	0	0	1	https://pubmed.ncbi.nlm.nih.gov/9407601/	Letter to the Editor providing study details looking at Missile Operators Sperm attributes compared to other occupations. Know details on radar frequencies but power density levels were recorded.
454	Reproductive function in relation to duty assignments among military personnel	Schrader	English	1998	USA	Reproductive Toxicology	UHF to Radar (300 MHz to 300 GHz)				Radar			No Effect	(Cross Sectional) Observational	Questionnaire and Job Role (No exposure assessment)	P>0.05 for all measurements. Note there were some trends however what was interesting (and concerning as it goes against most study findings) is the improved sperm morphology, motility and volume in the exposed when compared to control.	33 Exposed (Radar Men), 103 Controls	Reduced Testosterone - Blood, Reduced Follicle Stimulating Hormone (FSH) - Blood, Reduced Luteinizing Hormone (LH) - Blood, Sperm Count, Sperm Volume, Sperm Morphology, Motility, Linearity of Motion, Viability	Military Personnel	Government/Military	1	1	0	0	0	0	0	0	https://pubmed.ncbi.nlm.nih.gov/9717697/	Study had a small sample size for both exposed and controls. One could also argue that the control pool, made up of soldiers may still have exposures to RF from wireless radio transmitters, therefore an understimation of the effects is possible. This study is related to 2848 with this one being a slightly larger study. This study did not reproduce the same finding as the previous "pilot" study. T…
2819	Male infertility risk factors in a French military population	Velez De La Calle	English	2001	FRA	Human reproduction	ELF to SHF (3 Hz - 60 GHz) workers				Radar/EMF Fields			Uncertain Effect	Case Control	Questionnaire/Self Reported, Job Role	Radar OR 0.8 (0.4 - 1.6) Electromagnetic Fields OR 1.4 (0.7 - 2.5) Men Electromagnetic Fields OR 1.4 (0.7 - 2.8) Women	60 Cases and 165 Controls	Reduced Fertility (EMR), Reduced Fertility (Radar)	Military Personnel	Industry	1	0	0	0	1	0	0	0	https://academic.oup.com/humrep/article/16/3/481/642427	Study sample size is small, details of EMF exposures lacking, Radar exposure details lacking. Working on a Submarine was found to be associated but confounding factors not resolved. Assumed heating was the cause. Couples who had trouble conceiving were excluded as was a couple using IVF can lead to underestimation of risk. This is a poor study as it was simply a questionaire type study with no ob…
3225	Military service, deployments, and exposures in relation to amyotrophic lateral sclerosis etiology	Beard	English	2016	USA	Environment International	UHF to Radar (300 MHz to 300 GHz) - Not Exclusively an EMF Study				Radar/Microwaves			Uncertain Effect	Case Control	Questionnaire/Self Reported and Rank	OR 1.74 (0.89, 3.38)	621 Cases / 958 Matched Controls Radar-HF 45 Cases / 52 controls	Amyotrophic Lateral Sclerosis (ALS)	Military Personnel	Various US Government Dept.	1	1	0	0	0	0	0	0	https://pubmed.ncbi.nlm.nih.gov/26923711/	Issue with this study - Questionaire based. There were different case/control counts for Radar and Radio vs "microwave exposure" - they are the same. So many potential confounders - burning, explosions, herbicides etc. all showing an association. What about synergistic effects - i.e. interactions between them. High frequency RF fields had positive exposure-response trend.
4022	Leukemia and occupational exposure to electromagnetic fields: review of epidemiologic surveys	Savitz	English	1987	USA	Journal of Occupational Medicine	ELF to SHF (3 Hz - 60 GHz) workers				Radar/EMF Fields			Uncertain Effect	Review/Meta Analysis	Not relevant	Telegraph/Radio/Radar Operators Total Leukaemia RR 1.8 (1.4 - 2.6) Acute Leukaemia RR 2.1 (1.3 - 3.3) Acute Myelogenous Leukaemia RR 2.6 (1.4- 4.4)	Pooled data from multiple papers	Acute Leukemia, Acute Myeloid Leukaemia	Occupational	Not Specified	1	0	0	0	0	0	0	1	https://pubmed.ncbi.nlm.nih.gov/3546635/	Study found statistical significant findings but they cannot be exclusively associated with EMFs according to Author
305	Ionizing radiation, cellular telephones and the risk for brain tumours	Hardell	English	2001-12-01	SWE	European Journal of Cancer Prevention	ELF to SHF (3 Hz - 60 GHz) workers				Radar/Radio Waves			Uncertain Effect	Case Control	Questionnaire and Job Role	Brain Tumour OR 1.25 (0.41 - 3.82) Benign Brain Tumour OR 1.33 (0.22 - 7.98) Malignant Brain Tumour 1.20 (0.29 - 5.02)	209 Cases and 425 Controls (5 Cases and 8 Controls for Radar Exposure)	Brain Tumour (Radar), Brain Tumour (Mobile Phone)	Occupational	Swedish Medical Research Council	1	1	0	1	0	1	0	0	http://www.ncbi.nlm.nih.gov/pubmed/11916351
416	Cancer in radar technicians exposed to radiofrequency/microwave radiation: sentinel episodes	Richter	English	2000-07-01	ISR	International Journal Occupational Environmental Health	UHF to Radar (300 MHz to 300 GHz)		20	30000	Radar/Radio Waves			Effect	Case Series	Questionnaire and Job Role (Exposure Assessment included)	All Tumour Sites p < 0.001 RR >50 Hematolymphatic p >0.001 RR = 250 Lymphoma p <0.001 RR = 400	6 Occupationally Exposed Patients and 27 cohorts	Testicular Cancer (Seminoma), Melanoma (eye), Subjective Symptoms (Headache, Tinnitus, Dizziness, Numbness), Nasopharynx (Squamous Cell Carcinoma), Pituitory Tumour, Neurocytoma (Brain Tumour), Breast Cancer (female), Non Hodgkin's Lymphoma, Lymphoma, Leukaemia, Liver Cancer, Thyroid	Occupational	Not Specified	1	0	0	0	0	0	0	1	http://www.ncbi.nlm.nih.gov/pubmed/10926722
3397	A sentinel case series of cancer patients with occupational exposures to electromagnetic non-ionizing radiation and other agents	Stein	English	2011-01-17	ISR	European Journal of Oncology	ELF to SHF (3 Hz - 60 GHz) workers		20	30000	Radar/Radiowaves	Mixed		Effect	Case Series	Expert Assessment	Not provided	47 Cases	Testicular Cancer, Brain Tumour (Glioma), Liver, Colon/Rectal Cancer, Kidney Cancer, CNS Cancer, Leukaemia, Lymphoblastic Cancer, Hdgkins Lymphoma, Non Hodgkins Lymphoma, Acoustic Neuroma, Breast Cancer, Parotid Gland, Melanoma, Pituitary Gland, Pineal Gland, Lung Cancer, Prostate Cancer	Occupational		1	0	0	0	0	0	0	1	https://www.emf-portal.org/en/article/19536
													Effect	31	0.563636
													Uncertain Effect	15	0.272727
													No Effect	9	0.163636
													Total	55
													retracted	2

## Sheet: Funding
	Papers	Effect	Effect %	No Effect	No Effect %
Institution	29	27	0.931034	2	0.0689655
Unknown	75	72	0.96	3	0.04
Industry	12	7	0.583333	5	0.416667
Government	137	114	0.832117	23	0.167883
	Effect	No Effect	Effect %	No Effect %
Government	114	23	0.83	0.17
Institution	27	2	0.93	0.07
Industry	7	5	0.58	0.42
Unknown	72	3	0.96	0.04

## Sheet: Country
PaperID	Date_Pub	C_Code
210	2007-04-01	ITA
500	2011-07-06	TUR
568	2015-03-01	CHN
575	2014-10-10	FRA
640	2014-01-01	IND
682	2012-11-13	IND
855	2011-03-04	AUS
1144	2000-11-11	SWE
1239	2006-06-06	TUR
1248	1992-03-01	HRV
1276	2000-11-11	FRA
1332	2001-01-01	TUR
1406	2003-02-01	RUS
1407	2006-11-01	RUS
1408	2011-07-01	RUS
1409	2010-12-02	RUS
1410	2007-11-28	RUS
1464	2000-04-01	USA
1475	2000-10-01	USA
1482	2009-09-19	IND
1483	2009-07-01	IND
1497	2005-05-01	JPN
1499	2012-09-28	JPN
1500	2009-09-01	JPN
1502	2002-01-01	RUS
1511	2010-06-01	IND
1512	2012-09-01	IND
1513	2011-03-01	IND
1518	2003-05-20	RUS
1539	2002-09-12	USA
1540	2002-12-01	USA
1541	2004-09-16	USA
1542	2009-07-07	USA
1543	2006-05-01	USA
1553	2001-07-01	RUS
1554	2004-04-01	RUS
1556	2003-06-16	USA
1557	2006-09-01	USA
1558	2005-01-01	USA
1562	2001-10-01	USA
1574	2006-06-01	USA
1575	2008-03-01	USA
1576	2007-02-01	ARM
1593	2004-01-01	RUS
1594	2001-01-01	RUS
1599	2000-01-01	AUT
1621	2006-04-11	IND
1624	2012-03-17	IND
1625	2012-08-16	IND
1633	2004-04-01	GRC
1634	2002-08-30	USA
1635	2008-05-01	USA
1636	2004-09-01	USA
1637	2000-04-14	USA
1638	2001-01-26	USA
1673	2008-01-01	RUS
1674	2009-05-01	RUS
1683	2004-06-01	RUS
1684	2004-05-08	RUS
1685	2006-08-01	RUS
1687	2010-11-12	USA
1694	2011-02-01	AUS
1712	2004-03-01	USA
1725	2011-06-01	CHN
1742	2000-01-01	RUS
1754	2005-09-01	USA
1796	2008-03-28	ISR
1797	2009-06-07	ISR
1884	2007-01-22	DEU
1946	2000-03-01	USA
1960	2009-12-17	ARM
1961	2001-03-01	ARM
1968	2009-09-01	ITA
1969	2007-05-01	ITA
1970	2012-04-01	ITA
1976	2008-12-01	GBR
1998	2004-03-01	RUS
1999	2006-04-01	RUS
2002	2004-01-01	CHN
2005	2009-05-01	FRA
2006	2002-05-01	ITA
2007	2010-09-01	ISR
2008	2006-08-01	ISR
2021	2012-11-01	ITA
2023	2004-10-01	ITA
2029	2007-03-06	GBR
2035	2004-01-01	BRA
2052	2008-08-01	NOR
2062	2016-02-01	RUS
2064	2008-12-02	ISR
2092	2008-08-01	ISR
2103	2011-08-03	FRA
2139	2000-01-01	RUS
2152	2002-05-01	USA
2154	2008-08-07	FRA
2155	2009-03-09	FRA
2166	2000-05-01	USA
2181	2010-12-01	ESP
2182	2009-12-01	ESP
2193	2007-07-09	ITA
2195	2009-07-01	ITA
2203	2002-10-22	RUS
2207	2012-10-18	USA
2225	2002-08-01	RUS
2226	2010-10-09	UKR
2227	2009-07-03	UKR
2228	2002-07-22	UKR
2242	2012-03-01	USA
2244	2006-01-25	USA
2245	2003-03-12	USA
2246	2001-07-01	USA
2253	2009-12-01	USA
2255	2009-08-07	CHN
2256	2011-07-01	ARM
2263	2006-09-01	USA
2278	2005-01-01	DEU
2284	2011-06-30	CHN
2285	2009-04-01	CHN
2296	2002-08-04	CHN
2304	2006-06-19	FRA
2305	2006-11-01	FRA
2316	2000-12-20	ITA
2320	1990-02-01	HRV
2324	1999-12-01	HRV
2378	2017-05-01	IND
2711	2017-09-01	RUS
2838	2014-03-01	RUS
3001	1992-01-01	RUS
3004	1999-01-01	RUS
3017	2013-08-01	UKR
3059	1993-01-01	RUS
3111	2017-05-01	RUS
3118	2017-06-01	RUS
3187	2017-09-17	BEL
3270	2015-10-01	USA
3310	2018-12-10	AUS
3372	2014-07-01	ITA
3377	2002-08-01	NZL
3499	2014-06-03	GBR
3575	2016-07-01	IND
3625	2019-07-01	JPN
3641	1994-12-01	RUS
3642	1992-01-01	RUS
3646	1999-10-01	RUS
3651	1999-10-01	RUS
3652	1998-11-01	RUS
3653	1991-01-01	FRA
3677	2019-06-01	DEU
3699	2020-04-08	FRA
3720	2011-03-09	DEU
3736	2020-04-01	FRA
3763	1978-05-31	RUS
3787	1998-07-01	ROU
3797	2005-04-30	USA
3798	2018-02-20	ITA
3834	2006-01-01	EGY
3899	1997-07-07	RUS
3900	1996-01-01	RUS
3903	1994-05-01	RUS
3905	1992-07-01	RUS
3907	1990-01-01	RUS
3143	2015-11-01	ITA
2067	2013-04-30	RUS
355	2012-09-27	DEU
488	2010-01-01	ARM
2443	2016-08-08	JPN
267	1999-01-06	UKR
3913	1974-01-01	RUS
959	2005-03-01	ITA
598	2005-03-01	ITA
3847	1986-06-30	USA
3914	1998-12-06	CHE
3915	1978-01-01	DEU
3923	1983-07-01	DEU
3924	2017-06-06	ARM
3925	1997-08-01	USA
3926	1995-01-01	USA
3927	2014-12-29	JPN
3928	2013-03-21	ARM
3929	2008-01-01	ARM
3930	2011-11-17	ARM
3931	2012-10-18	ARM
3932	2012-04-01	ARM
3933	1968-04-27	CAN
3934	1969-06-21	CAN
3935	2017-12-21	JPN
3937	1993-05-02	RUS
3939	1980-06-16	USA
3940	1981-01-01	USA
3941	2005-06-15	FRA
3942	2009-08-04	FRA
3947	2010-07-19	USA
3948	1982-01-01	JPN
3949	1984-05-01	JPN
3950	1997-01-01	USA
3951	1996-12-05	USA
3952	1997-01-22	USA
3953	2011-02-18	USA
3954	2013-06-28	USA
3955	2014-11-15	USA
3958	2015-09-01	RUS
3959	1992-01-01	RUS
3960	1995-02-06	RUS
3961	2012-06-01	ARM
3962	2018-06-18	ITA
3964	2013-06-01	ITA
3965	1979-03-15	POL
3967	2013-06-13	UKR
3968	1996-06-13	RUS
3971	1998-08-17	RUS
3972	2011-02-01	RUS
3973	2013-08-01	RUS
3974	2015-01-30	RUS
3975	1971-10-01	CAN
3976	1993-06-01	CZE
3970	1981-03-30	USA
3969	1996-01-01	RUS
3956	2014-08-14	ITA
3943	2013-07-09	ITA
4005	2016-08-16	FRA
4028	1995-01-01	ITA
4037	2018-07-01	ITA
4045	1996-07-07	ITA
4047	2003-06-01	ITA
4141	1998-09-25	USA
4142	2000-04-01	USA
4144	1992-06-01	DEU
4145	1997-10-01	USA
4148	1992-12-01	DEU
4149	1989-09-01	DEU
4150	1977-12-19	DEU
4151	1982-03-01	DEU
4152	1974-01-19	CAN
4136	2009-09-01	RUS
4156	1977-02-21	USA
4153	1975-02-01	CAN
4154	1979-07-12	DEU
4155	1977-02-10	USA
		USA	51
		Russia	54
		Italy	23
		France	14
PaperID	Date_Pub	C_Code
4394.24	2007-04-01	ITA
4408.75	2011-07-06	TUR
4423.27	2015-03-01	CHN
4437.79	2014-10-10	FRA
4452.3	2014-01-01	IND
4466.82	2012-11-13	IND
4481.33	2011-03-04	AUS
4495.85	2000-11-11	SWE
4510.36	2006-06-06	TUR
4524.88	1992-03-01	HRV
4539.4	2000-11-11	FRA
4553.91	2001-01-01	TUR
4568.43	2003-02-01	RUS
4582.94	2006-11-01	RUS

## Sheet: Notes
Notes on this document Table 1.xlsx
This document summarises all papers in the ODEB database relevant to non-thermal research into the biological and health effects of 5G / mmWaves.											www.orsaa.org
These papers can be used for future research or systematic reviews, as most of the existing relevant mmWave literature can be found in this document.
1. The first tab [all >6GHz experimental papers] contains the results of searching ODEB for studies that carried out experiments using mmWaves.
The columns in this tab show the authors, title, journal of publication, URL (last column);
Then there are many columns showing fields of classification in ODEB such as:
whether the study was in vitro or in vivo, government or industry-funded, and what outcomes were found, for example, fertility effects.
The table at the bottom of this tab counts the number of effects papers and no effects papers for each biological or health outcome using the column listings.
2. The second tab [effects vs no effects graph} shows a graph of all outcomes and the number of papers within each outcome column in the first tab that showed effects and no effects.
3. The third tab [epidemiological papers] lists all of the studies that recorded epidemiological data around towers or devices that emitted mmWaves.
This tab contains similar category information to the first tab (the experimental papers).
4. The fourth tab {funding] graphs both the experimental and epidemiological papers into funding source categories.
Then within these categories, the graph shows the counts of the number of papers that show any "Effects" versus the number of papers that show "No Effects".
5. The fifth tab [Country] shows the number of mmWave relevant papers published in various countries around the world
ODEB is a free research tool and as such will require some effort in discovering how to use its many search features. There are tutorials there showing how to search ODEB.
There is a webinar that will show you how to search at :
https://www.orsaa.org/orsaa-database-training-webinar.html
For more details: https://www.orsaa.org/orsaa-database.html
The database is found at: https://a037613.fmphost.com/fmi/webd/Research_Review_V4.
